# Supplementary material
Source: PubMed Central journal article supplement (PMC9397608)
Supplement: can-21-0613_supp.pdf [file can-21-0613_supp.pdf]

## **METHODS**

### **Crystal structure of SRC bound to eCF506**

*Expression and purification.* The hSrc kinase domain (residues 254-536) or hSrc-SH3-SH3-kinase (84-536) were expressed with an N-terminal 6xHis tag in E.coli (BL21) co-expressed with the YopH phosphatase, as described in ref. 1. Pure protein was obtained by Ni-chelate affinity chromatography (HisTrap, GE Healthcare), ion exchange chromatography (Source 15Q column, GE Healthcare) and size exclusion chromatography (Superdex200, GE Healthcare). After the Ni-chelating column, the 6xHis tag was removed by incubation with TEV protease.

*Crystallization.* Purified hSrc kinase was concentrated to 6.3 mg/ml (193  $\mu$ M) and incubated with 10 mM eCF506 for 30 min on ice. Crystallisation was performed using the hanging drop, vapor diffusion method. Crystallization conditions were optimized from ref. 2 with final crystals grown by mixing the protein with equal volume of 6% PEG3350, 300 mM ammonium acetate, 0.1M HEPES pH 7.5, 10 mM TCEP. Crystals were flash frozen in liquid nitrogen after soaking in growth condition with 25% ethylene glycol.

*Data collection and structure solution.* Diffraction data collection was carried out at the XALOC beamline of the ALBA synchrotron facility (Barcelona, Spain). Data was integrated to 1.5 Å using XDS (3), scaled with AIMLESS (4) and an initial structure obtained by molecular replacement with PHASER (5) using the Src kinase domain (PDB: 4MXO) as search probe. The structure was refined using Refmac5 (6) and manual rebuilding with Coot (7). Final R-factors are 18.0/21.3 ( $R_{\text{work}}/R_{\text{free}}$ ). Final crystallographic and refinement statistic are listed in Table S1.

### **Biophysical characterization of SRC hydrodynamic radius**

*Sedimentation velocity analytical ultracentrifugation (SV-AUC).* SV-AUC assays were performed at the Molecular Interactions Facility at the CIB Margarita Salas. Protein samples at concentrations

of 15  $\mu\text{M}$  in 20 mM Tris-HCl, 150 mM NaCl and 1 mM TCEP pH 8.0 buffer, were loaded (320  $\mu\text{L}$ ) into analytical ultracentrifugation cells. SV-AUC assays were carried out at 20 °C and 48,000 rpm in a XL-I analytical ultracentrifuge (Beckman-Coulter Inc.) equipped with both UV-VIS absorbance and Raleigh interference detection systems, using an An-50Ti rotor, and 12 mm Epon-charcoal standard double-sector centerpieces. Sedimentation profiles were recorded at 290 nm. Differential sedimentation coefficient distributions were calculated by least-squares boundary modelling of sedimentation velocity data using the continuous distribution  $c(s)$  Lamm equation model as implemented by SEDFIT (8). These  $s$  values were corrected to standard conditions (water, 20 °C, and infinite dilution) (9) using the program SEDNTERP (10) to get the corresponding standard  $s$  values ( $s_{20,w}$ ).

*Dynamic Light Scattering (DLS)*. DLS experiments were carried out at the Molecular Interactions Facility at the CIB Margarita Salas. The experiments were performed using a Protein Solutions DynaPro MS/X instrument (Protein Solutions) at 20 °C and a 90° light scattering cuvette. The samples were centrifuged during 10 min at 12,000 g and 20 °C immediately before measurements. Data were collected and analysed with the Dynamics V6 Software.

### **Kinome profiling of eCF506**

Screenings were performed by Reaction Biology Corp. using a radioisotope-based assay ( $[\gamma\text{-}^{33}\text{P}]$  ATP) consisting of measuring  $^{33}\text{P}$  incorporation on the substrate (poly [Glu, Tyr] 4:1) relative to DMSO. For the whole kinome screen eCF506 was screened against 340 wild type kinases at a single dose of 1  $\mu\text{M}$ , in duplicate, with 10  $\mu\text{M}$  of ATP. Enzymatic activity values relative to DMSO (considered as 100% of activity) were averaged and plotted in Table S3 (see comparison with dasatinib and bosutinib in Table S4).

### Thermal shift assays

The protocol was adapted from Jafari *et al.* (11). Cells were seeded (3 million / 10 cm dish) and left to attach for 24 h. Compounds were added (final DMSO concentration 0.1% v/v) and cells incubated for 1 h before being washed with PBS, trypsinized, collected in PBS and centrifuged (300 g, 3 min). The cell pellet was gently resuspended in 10 mL PBS, centrifuged again (300 g, 3 min), resuspended in 1 mL PBS with protease inhibitors (aprotinin, leupeptin) and compounds were added back to samples at the previously used concentrations. Each sample was split into 10 PCR tubes (100  $\mu$ L) which were heated at different temperatures (40.0  $^{\circ}$ C to 65.0  $^{\circ}$ C) for 3 min. Samples were cooled at room temperature for 3 min before being put on ice, lysed in 100  $\mu$ L of a mild detergent lysis buffer prepared at 2X (40 mM Tris HCl pH 7.5, 300 mM NaCl, 1 % v/v Triton X100), briefly vortexed and centrifuged at 4  $^{\circ}$ C (17,000 g, 20 min). The supernatant was transferred into a new microcentrifuge tube and stored at -20  $^{\circ}$ C. Standard Western blots were performed and relative protein amounts quantified to assess heat degradation of the compounds' protein targets compared to DMSO controls.

### Cell-based screenings

For cell proliferation assays, cells were seeded in 96-well plates as specified below.

| Cell line    | Medium | Supplements               | Cells / well |
|--------------|--------|---------------------------|--------------|
| BT-474       | RPMI   | 10% FBS, 2 mM L-glutamine | 5,000        |
| BT-549       | RPMI   | 10% FBS, 2 mM L-glutamine | 1,000        |
| CAMA-1       | DMEM   | 10% FBS, 2 mM L-glutamine | 1,000        |
| HCC-1569     | DMEM   | 10% FBS, 2 mM L-glutamine | 3,000        |
| HCC-1954     | DMEM   | 10% FBS, 2 mM L-glutamine | 2,000        |
| JIMT-1       | DMEM   | 10% FBS, 2 mM L-glutamine | 1,000        |
| KPL-4        | DMEM   | 10% FBS, 2 mM L-glutamine | 1,000        |
| MCF-7        | DMEM   | 10% FBS, 2 mM L-glutamine | 1,000        |
| MDA-MB-134VI | RPMI   | 10% FBS, 2 mM L-glutamine | 10,000       |

|                   |            |                                                                                                                                                                                                                 |       |
|-------------------|------------|-----------------------------------------------------------------------------------------------------------------------------------------------------------------------------------------------------------------|-------|
| <b>MDA-MB-157</b> | DMEM       | 10% FBS, 2 mM L-glutamine                                                                                                                                                                                       | 5,000 |
| <b>MDA-MB-231</b> | DMEM       | 10% FBS, 2 mM L-glutamine                                                                                                                                                                                       | 1,000 |
| <b>MDA-MB-436</b> | DMEM       | 10% FBS, 2 mM L-glutamine                                                                                                                                                                                       | 3,000 |
| <b>MetBo2</b>     | DMEM       | 10% FBS, 2 mM L-glutamine                                                                                                                                                                                       | 1,000 |
| <b>SCC</b>        | MEM        | 10% FBS, 2 mM L-glutamine, 1X MEM non-essential amino acids, 1X MEM vitamins, 1 mM sodium pyruvate; 1% Hygromycin                                                                                               |       |
| <b>SKBR3</b>      | DMEM       | 10% FBS, 2 mM L-glutamine                                                                                                                                                                                       | 4,000 |
| <b>SUM44PE</b>    | Ham's F-12 | 1 g/L BSA, 5 mM ethanolamine, 10 mM HEPES, 1 µg/mL hydrocortisone, 5 µg/mL insulin, 50 nM sodium selenite, 5 µg/mL apo-transferrin, 10 nM triiodo thyronine; 2% FBS was added when thawing and splitting cells. | 5,000 |
| <b>SYF</b>        | DMEM       | 10% FBS, 2 mM L-glutamine                                                                                                                                                                                       |       |
| <b>T47-D</b>      | RPMI       | 10% FBS, 2 mM L-glutamine                                                                                                                                                                                       | 2,000 |
| <b>ZR75.1</b>     | RPMI       | 10% FBS, 2 mM L-glutamine                                                                                                                                                                                       | 4,000 |

### Cell cycle assay

Cells were seeded (1 million cells / 15 cm plate) and left to attach for 24 h. Compounds were added (final DMSO concentration 0.1% v/v) and the treated plates were incubated for 48 h. Cells were trypsinized, resuspended in medium and centrifuged (1,000 rpm, 5 min). The cell pellet was resuspended in 50 µL PBS with 2 % FBS and cell aggregates were broken up through gentle pipetting. Cells were fixed by adding 1 mL ice-cold 70 % ethanol dropwise while vortexing gently and samples were stored at 4 °C for up to two weeks. The cell concentration was determined using a hemocytometer and 1.5 million cells were used per sample. Cells were centrifuged (1,000 rpm, 5 minutes) and the cell pellet was resuspended in 2 mL pre-warmed pepsin solution and incubated for 30 min in a 37°C water bath with frequent vortexing. The digested samples were centrifuged (4,000 rpm, 4 minutes) and the pellet was resuspended in 0.25 mL HCl and incubated for 15 min at room temperature. 12 mL PBS was added and samples were centrifuged (4,000 rpm, 4 minutes), after which the pellet was washed a second time in 5 mL PBS. The pellet was resuspended in 0.5

mL DAPI solution and incubated in the dark for 30 min at room temperature. Samples were analyzed by flow cytometry using the LSR Fortessa (BD Biosciences) and 30,000 events were recorded per sample.

## Western blotting

List of antibodies used for western blot assays.

**Antibody list.** Antibodies for Western blots were diluted in blocking buffer with 0.02% w/v sodium azide.

| Target                   | Host   | Company    | ID      | Dilution  |
|--------------------------|--------|------------|---------|-----------|
| <b>Western blots</b>     |        |            |         |           |
| $\alpha$ -tubulin        | Mouse  | CST        | 3873    | 1 / 1000  |
| $\beta$ -actin           | Mouse  | CST        | 3700    | 1 / 1000  |
| $\beta$ -catenin         | Rabbit | CST        | 9582    | 1 / 1000  |
| BRCA1                    | Rabbit | CST        | 9010    | 1 / 1000  |
| FAK                      | Rabbit | CST        | 3285    | 1 / 1000  |
| FAK (clone 4.47)-agarose | Mouse  | Millipore  | 05-537  | 5 $\mu$ g |
| FAK-pY397                | Rabbit | CST        | 3283    | 1 / 1000  |
| FAK-pY861                | Rabbit | Invitrogen | 44626   | 1 / 1000  |
| GAPDH                    | Rabbit | CST        | 5174    | 1 / 1000  |
| GM130                    | Mouse  | BD         | 610822  | 1 / 1000  |
| Histone H4               | Mouse  | CST        | 2935    | 1 / 1000  |
| mTOR (S2448)             | Rabbit | CST        | 2971    | 1 / 1000  |
| Rb                       | Mouse  | CST        | 9309    | 1 / 1000  |
| SRC                      | Rabbit | CST        | 2109    | 1 / 1000  |
| SRC                      | Mouse  | SCB        | SC-8056 | 1 / 1000  |
| SRC-pY416 (419)          | Rabbit | CST        | 2101    | 1 / 1000  |
| SRC-pY527 (530)          | Rabbit | CST        | 2105    | 1 / 1000  |
| Anti-Mouse               | Horse  | CST        | 7076    | 1 / 5000  |
| Anti-Rabbit              | Goat   | CST        | 7074    | 1 / 5000  |

## **Proteomics study**

The general procedure for the reverse phase protein array has previously been published by Macleod *et al.* (13). Cells were seeded in 6-well plates (MDA-MB-231 400,000 cells / well; MCF-7 600,000 cells / well) and left to attach for 24 h. Compounds were added (final DMSO concentration 0.1% v/v) and plates incubated for 3 or 24 h. Cells were washed twice with 3 mL PBS and lysed with 80  $\mu$ L CLB1 (Bayer Technology Services), scraped and collected in microcentrifuge tubes and incubated at room temperature for 30 min with occasional vortexing. Lysates were centrifuged (17,000 g, 10 min) and the supernatant transferred to new microcentrifuge tubes. The protein concentration was determined in a Bradford Assay using the Coomassie Plus Protein Assay (Thermo Scientific) according to the manufacturer's instructions and all samples were adjusted to 2 mg/mL. 20  $\mu$ L of the samples were diluted 1:10 with spotting buffer CSBL1 (Bayer Technology Services) and a dilution series (0.2, 0.15, 0.1, 0.05 mg/mL) was created with CSBL1 and 10 % CLB1. The diluted samples were transferred onto a 384-well plate and printed as single spots onto ZeptoChips using the Nanoplotter 2.1E (GeSim) in a controlled environment (70 % humidity, 14 °C). Fluorescently labelled BSA standards were also printed onto the slides. ZeptoChips were blocked for 1.5 h in blocking buffer BB1 (Bayer Technology Services), washed three times for 2 min in distilled water, dried by centrifugation and washed 3 times with 90  $\mu$ L CAB1 buffer (Bayer Technology Services). Primary antibodies diluted in CAB1 or CAB2 buffer were added and incubated at room temperature overnight, before ZeptoChips were washed three times with CAB1, and 90  $\mu$ L of appropriate Alexa Fluor conjugated secondary antibodies were added and incubated for 2.5 h in the dark at room temperature. ZeptoChips were washed three times with CAB1, with the last wash left on, and slides scanned using the ZeptoReader (Zeptosens-Bayer). Exposure times just below saturation of the fluorescent signal were automatically selected for analysis by the ZeptoView 3.1 software and a weighted linear fit through the 4-fold dilution series was used to calculate the relative fluorescence intensity (RFI) of

each sample. Normalization to the reference BSA signal was used to compensate for intra- and inter-chip variation. Proteins with low signal were excluded from the analysis. A total of 76 proteins and post-translational modifications were included in the analysis. The local normalized RFI values were then normalized to DMSO controls for each cell line, relative protein abundance expressed as z-scores plotted as heat maps and hierarchical clustering performed (Euclidian distance, complete linkage) using the free online Morpheus software (Broad Institute).

### **Subcellular fractionation**

Cells were seeded in 10 cm dishes and left to attach for 48 h, after which compounds were added (final DMSO concentration 0.1% v/v) and cells incubated for 6 h. Cells were washed twice with ice-cold PBS and 300  $\mu$ L (10 cm) Buffer A with detergent (20 mM Tris pH 7.5, 1 mM MgCl<sub>2</sub>, 1 mM EGTA, 1.25 mM PMSF, 0.1 % v/v aprotinin, 100  $\mu$ M Na<sub>3</sub>VO<sub>4</sub>, 500  $\mu$ M NaF, 0.03 % v/v NP-40) was added before cells were gently scraped, collected in microcentrifuge tubes and rotated at 4 °C for 5 min. Samples were centrifuged at 4 °C (800 g, 4 min) and both the supernatant and pellet were kept. The supernatant was transferred into a new tube to which NP-40 was added to a final concentration of 1% v/v, samples vortexed rigorously and centrifuged at 4 °C (17,000 g, 10 min). The supernatant was transferred into a new microcentrifuge tube and labelled as 'cytoplasmic fraction'. The pellet from the previous step was washed once with Buffer A with detergent and once with Buffer A without NP-40 detergent by flicking the tubes until the pellet was suspended, centrifuging at 4 °C (800 g, 3 min) and removing the supernatant. The pellet was resuspended in two volumes of Buffer B (10 mM Tris-HCl pH 7.4, 2.5 mM MgCl<sub>2</sub>, 1.5 mM KCl, 0.2 M LiCl, 1.25 mM PMSF, 0.1% v/v aprotinin, 100  $\mu$ M Na<sub>3</sub>VO<sub>4</sub>, 500  $\mu$ M NaF, 0.1 % v/v Triton X100, 0.1 % w/v sodium deoxycholate), samples rotated at 4 °C for 15 min, centrifuged at 4 °C (2,000 g, 5 min) and both the supernatant and pellet were kept. The supernatant was transferred into a new tube and centrifuged at 4 °C (17,000 g, 10 min). The supernatant was transferred into a

new microcentrifuge tube and labeled as ‘perinuclear fraction’. The pellet from the previous step was washed twice with Buffer B by flicking the tubes until the pellet was suspended, centrifuging at 4 °C (2,000 g, 3 min) and removing the supernatant. The pellet was resuspended in two volumes of RIPA lysis buffer (related to pellet size), sonicated for five cycles (30 s on, 30 s off) and centrifuged at 4 °C (17,000 g, 10 min). The supernatant was transferred into a new microcentrifuge tube and labelled as ‘nuclear fraction’. Western blots were performed as described above.

### **Ames test**

The mutagenic potential of eCF506 was assessed by Sequani Ltd (UK) in 4 strains of *Salmonella typhimurium* (TA1535, TA1537, TA98, TA100) and 1 strain of *Escherichia coli* (WP2 uvrA), in the presence and absence of a metabolic activation system (S-9 mix) to allow detection of both point and frame shift mutations. A range of six concentrations of eCF506 up to 5,000 µg / plate were tested in triplicate alongside negative and positive controls (see box below).

The following components were mixed in an Eppendorf tube:

- 2 mL of L-histidine: D-biotin solution (*Salmonella*) or tryptophan (*Escherichia*) supplemented top agar.
- 0.1 mL bacterial culture.
- 0.5 mL of S-9 mix *or* 0.2 M phosphate buffer.
- 0.1 mL solvent (negative control) *or* eCF506 dilution *or* positive control.

The mixtures were added to Petri dishes containing minimal agar, which were inverted when set and incubated at  $37 \pm 3$  °C. The integrity of the background lawns was assessed and revertant colonies were scored after approx.  $66 \pm 1$  h using an image analyser. Statistical analysis was carried out using Dunnett’s t-test.

Ames test positive controls.



| Strain                        | Without S-9 mix                         | With S-9 mix                      |
|-------------------------------|-----------------------------------------|-----------------------------------|
| <i>Salmonella typhimurium</i> |                                         |                                   |
| TA1535                        | Sodium azide (1 µg / plate)             | 2-aminoanthracene (2 µg / plate)  |
| TA1537                        | 9-aminoacridine (50 µg / plate)         | 2-aminoanthracene (4 µg / plate)  |
| TA98                          | 2-nitrofluorence (1 µg / plate)         | 2-aminoanthracene (2 µg / plate)  |
| TA100                         | Sodium azide (1 µg / plate)             | 2-aminoanthracene (4 µg / plate)  |
| <i>Escherichia coli</i>       |                                         |                                   |
| WP2 uvrA                      | 4-nitroquinoline-N-oxide (1 µg / plate) | 2-aminoanthracene (10 µg / plate) |

### Animal experiments

Animal experiments were performed under Home Office License in compliance with the Animals (Scientific Procedures) Act 1986 and approved by the University of Edinburgh Ethics Committee.

### Acute toxicity

Acute toxicity studies were performed by Evotec (France) to determine the maximum tolerated dose (MTD) of eCF506 following a single oral administration by gavage to male and female Swiss mice and Sprague-Dawley rats. 6 to 8 week-old animals were obtained from Janvier Labs (France) and acclimatized for at least 5 d, and split randomly into groups. eCF506 was formulated in citrate buffer and administered once by oral gavage, with the quantity being adjusted for the respective weight of the animal and received dose being within  $\pm 10\%$  of the theoretical dose. Body weight, temperature and observations for adverse clinical signs or premature death were recorded pre-dosing and 1, 2, 4, 6, 8 and 24 h post-dosing. Blood samples were collected 24 h after dosing from the vena cava and analyzed on a VetScan HM5 hematology analyzer (Abaxis). Post-mortem examinations were performed 24 h after dosing with animals being anesthetized by isoflurane inhalation and exsanguinated prior to cervical dislocation. Necropsy was performed with animals being examined visually for external abnormalities and palpable masses; abnormalities in the

abdominal, thoracic and cranial cavities and contents; and gross abnormalities on organs after their removal.

### **Immunohistochemistry**

Formalin fixed tumours were embedded in paraffin wax blocks using standard procedures by the Pathology Technical Services team (IGMM, University of Edinburgh). Sections (5 µm thick) were cut from paraffin embedded tumours using a microtome, placed on SuperFrost Plus™ slides (Thermo) and dried at 40 °C for 24 h. Sections were dewaxed in xylene, followed by rehydration and antigen retrieval using boiling citrate buffer, pH 6.0, in a pressure cooker (121 °C). Endogenous peroxidases were blocked using Dako REAL Peroxidase-Blocking solution (Agilent, S2023), washed in tap water and were incubated with Dako Serum-free Protein Block (Agilent, X0909), or 2.5% normal goat serum (for B220 rat antibody). Primary antibodies diluted in Dako Background Reducing Antibody Diluent (Agilent, S3022) and incubated with tumour sections at 4 °C overnight. Sections were washed in TBS and incubated with secondary (#P0448 or ImmPRESS HRP Goat Anti-Rat IgG Polymer Detection Kit, Vector Labs, MP-7404-50) for 30 min. Sections were washed in TBS, incubated with DAB reagent (#K3468) for 5 min. Finally, sections were counter-stained with haematoxylin, dehydrated with ethanol and xylene, and mounted using DPX mounting medium (Sigma-Aldrich, #44581). Staining was scored by a single experienced observer, blinded to treatment. Images were acquired on a Hamamatsu NanoZoomer using a 40 X objective, and tumors were analyzed using QuPath analysis software (14). Antibodies: Phospho-Src Family (Tyr416) Rabbit CST 2101, 1 / 200; anti-CD3 Rabbit Abcam ab5690, 1/100 and anti-B220 Rat Biolegend 103202, 1/500.

## **Transcriptomics**

RNA was extracted using the RecoverAll Total Nucleic Acid Isolation kit (#AM1975, Ambion) according to the manufacturer's instructions with a DNase digestion step included. 300ng of purified RNA was analyzed using the nanoString PanCancer Immune Profiling Panel following manufacturer's instructions. Hybridization was performed for 18 h at 65 °C prior to processing on the nCounter Prep Station set to high sensitivity. Images were captured (555 Fields of View) and analysed on the nCounter Digital analyser, and data normalized using nSolver 4.0 software.

## SUPPLEMENTARY TABLES

**Table S1.** Diffraction and refinement statistics.

|                                      | SRC-eCF506       |
|--------------------------------------|------------------|
| Space group                          | P2 <sub>1</sub>  |
| <b>Cell dimensions</b>               |                  |
| <i>a</i> , <i>b</i> , <i>c</i> (Å)   | 41.8, 62.6, 51.4 |
| $\alpha$ , $\beta$ , $\gamma$ (°)    | 90.0, 98.0, 90.0 |
| Resolution (Å)*                      | 1.50             |
| R <sub>merge</sub> * (%)             | 6.7 (76.3)       |
| R <sub>meas</sub> * (%)              | 8.0 (91.1)       |
| R <sub>pim</sub> * (%)               | 4.3 (49.3)       |
| CC (1/2)*                            | 0.998 (0.626)    |
| Mean (I/σ(I))*                       | 11.7 (1.7)       |
| Completeness (%)*                    | 99.4 (99.4)      |
| Multiplicity *                       | 3.3 (3.3)        |
| <b>Refinement</b>                    |                  |
| Resolution (Å)                       | 41.41-1.50       |
| No. reflections                      | 39589            |
| R <sub>work</sub> /R <sub>free</sub> | 18.0/21.3        |
| No. atoms (all)                      | 2477             |
| Protein                              | 2213             |

|                  |       |
|------------------|-------|
| Ligand           | 41    |
| Water            | 223   |
| B- factors (all) | 19.1  |
| Protein          | 18.4  |
| Ligand           | 13.4  |
| Water            | 26.9  |
| R.m.s. deviation |       |
| Bond lengths (Å) | 0.010 |
| Bond angles (°)  | 1.612 |

\* Highest resolution range shown in parentheses

**Table S2.** Hydrodynamic radius of SRC (84-536) obtained by SV-AUC and DLS in the absence (SRC-Apo) and presence of dasatinib or eCF506. All values are the mean from 3 measurements. Error =  $\pm$  S.D.

| <b>Sample</b> | <b>SV-AUC</b>     | <b>DLS</b>        |
|---------------|-------------------|-------------------|
|               | $S_{20,w}$        | R (nm)            |
| SRC-Apo       | 3.651 $\pm$ 0.004 | 3.257 $\pm$ 0.132 |
| SRC-Dasatinib | 3.523 $\pm$ 0.021 | 3.649 $\pm$ 0.022 |
| SRC-eCF506    | 3.656 $\pm$ 0.014 | 3.332 $\pm$ 0.042 |

**Table S3.** IC<sub>50</sub> (nM) values calculated for eCF506 and dasatinib in a selection of 16 recombinant kinases. Member of SRC family of kinases are highlighted in red.

| Kinase                                             | IC <sub>50</sub> values (nM) |                 |
|----------------------------------------------------|------------------------------|-----------------|
|                                                    | eCF506                       | Dasatinib       |
| ABL                                                | 479                          | < 0.5           |
| <b>BLK</b>                                         | <b>5.4</b>                   | <b>&lt; 0.5</b> |
| BRK                                                | 17.3                         | 41.5            |
| <b>FGR</b>                                         | <b>&lt; 0.5</b>              | <b>&lt; 0.5</b> |
| <b>FRK/PTK5</b>                                    | <b>2.8</b>                   | <b>&lt; 0.5</b> |
| <b>FYN</b>                                         | <b>2.1</b>                   | <b>&lt; 0.5</b> |
| <b>HCK</b>                                         | <b>2.8</b>                   | <b>2.0</b>      |
| KIT                                                | 6,460                        | 39.0            |
| <b>LCK</b>                                         | <b>&lt; 0.5</b>              | <b>&lt; 0.5</b> |
| <b>LYN</b>                                         | <b>0.8</b>                   | <b>&lt; 0.5</b> |
| mTOR                                               | >10,000                      | >10,000         |
| PDGFR $\alpha$                                     | >10,000                      | 9.9             |
| <b>SRC</b>                                         | <b>&lt; 0.5</b>              | <b>&lt; 0.5</b> |
| RET                                                | >10,000                      | 433             |
| <b>YES</b>                                         | <b>&lt; 0.5</b>              | <b>&lt; 0.5</b> |
| IC <sub>50</sub> (ABL) /<br>IC <sub>50</sub> (SRC) | <b>950</b>                   | <b>1</b>        |
| IC <sub>50</sub> (KIT) /<br>IC <sub>50</sub> (SRC) | <b>12,920</b>                | <b>78</b>       |

**Table S4.** Kinome screening of eCF506. Table shows all 340 tested kinases in order of sensitivity to eCF506. Values show the percentage of remaining kinase activity when treated with 1  $\mu$ M eCF506 at 10  $\mu$ M of ATP, relative to DMSO. Data represents average of n=2.

| <i>Kinase</i> | <i>% Activity</i> | <i>Kinase</i>  | <i>% Activity</i> | <i>Kinase</i>  | <i>% Activity</i> | <i>Kinase</i> | <i>% Activity</i> |
|---------------|-------------------|----------------|-------------------|----------------|-------------------|---------------|-------------------|
| SRC           | 0.1               | MAP4K5         | 81.7              | CK2a           | 92.8              | PKG1a         | 96.6              |
| BRK           | 0.2               | RSK4           | 83.3              | ROCK2          | 92.8              | LRRK2         | 96.6              |
| HCK           | 0.8               | SGK3           | 83.4              | CDK2/cyclin A1 | 92.9              | CAMK1d        | 96.7              |
| FGR           | 1.3               | ZAK            | 83.4              | DYRK3          | 93.0              | PKCg          | 96.7              |
| LYN           | 1.3               | FGFR3          | 84.7              | DAPK3          | 93.0              | FLT3          | 96.8              |
| LCK           | 1.4               | ALK1           | 85.9              | EPHB3          | 93.1              | TAOK2         | 96.9              |
| ARAF          | 1.7               | EPHA1          | 86.7              | NLK            | 93.1              | ULK3          | 97.0              |
| YES           | 1.8               | MAP4K3         | 87.0              | SRPK1          | 93.3              | MAPKAPK2      | 97.0              |
| LYN B         | 2.0               | PAK3           | 87.3              | CK1e           | 93.4              | RSK2          | 97.1              |
| FYN           | 2.3               | MET            | 87.5              | SIK2           | 93.6              | CDK1/cyclin A | 97.1              |
| FRK           | 2.4               | IKKa           | 87.6              | VRK2           | 93.6              | NEK9          | 97.1              |
| BMX           | 2.8               | MUSK           | 89.0              | PRKG2          | 93.7              | CDK3/cyclin E | 97.2              |
| BTK           | 3.8               | LATS2          | 89.0              | IKKe           | 93.8              | TLK1          | 97.3              |
| ERBB4         | 4.5               | PKCb2          | 89.1              | ULK1           | 93.9              | MAP4K4        | 97.3              |
| BLK           | 4.8               | GSK3a          | 89.2              | TESK1          | 94.3              | MLK2          | 97.3              |
| CSK           | 5.0               | ERK7           | 89.4              | DYRK1B         | 94.6              | MST2          | 97.4              |
| TXK           | 9.1               | TYK2           | 89.6              | GSK3b          | 94.6              | p38-beta      | 97.4              |
| RIPK3         | 12.1              | BMPR2          | 89.6              | MAPKAPK5       | 94.6              | CAMK1a        | 97.4              |
| RAF1          | 19.6              | WNK3           | 90.3              | PKG1b          | 94.6              | JAK2          | 97.5              |
| ARG           | 28.7              | CDK16/cyclin Y | 90.4              | FGFR4          | 94.9              | PDPK1         | 97.5              |
| LIMK2         | 30.0              | PIM3           | 90.6              | MSSK1          | 94.9              | p38-alpha     | 97.5              |
| MER           | 30.1              | MAP4K2         | 90.6              | TAOK1          | 95.0              | NEK2          | 97.7              |
| BRAF          | 35.5              | CAMK1b         | 90.7              | JNK3           | 95.1              | MAPKAPK3      | 97.7              |
| TEC           | 43.9              | RON            | 90.9              | ARK5           | 95.1              | PKCd          | 97.8              |
| SRMS          | 46.2              | p38-gamma      | 90.9              | HIPK2          | 95.2              | MNK1          | 97.8              |
| ACK1          | 54.3              | CK1g2          | 90.9              | HIPK3          | 95.2              | MRCKa         | 97.9              |
| ABL           | 56.3              | ACVR1B         | 90.9              | CLK3           | 95.2              | NEK3          | 98.0              |
| AXL           | 64.1              | RPS6KA5        | 91.1              | CDK1/cyclin B  | 95.3              | EPHA7         | 98.1              |
| EPHB2         | 66.6              | MEK1           | 91.1              | PHKg2          | 95.3              | TNIK          | 98.1              |
| EPHB4         | 68.5              | LCK2           | 91.2              | DYRK1A         | 95.3              | DYRK2         | 98.2              |
| PAK2          | 71.2              | CAMK2a         | 91.5              | RPS6KB1        | 95.4              | ALK3          | 98.2              |
| RSK1          | 72.2              | CAMK1g         | 91.5              | MLK1           | 95.5              | ITK           | 98.2              |
| PKAcb         | 74.3              | DMPK2          | 91.5              | EPHA8          | 95.6              | CK1g3         | 98.2              |
| MAP3K8        | 74.6              | IRAK1          | 91.8              | CDK9/cyclin K  | 95.7              | ERK5          | 98.4              |
| Kit           | 75.1              | EPHA5          | 92.0              | STK16          | 95.7              | PHKg1         | 98.5              |
| NEK11         | 75.3              | PKN1           | 92.1              | PIM1           | 95.9              | PKN3          | 98.5              |
| RIPK2         | 76.8              | CLK2           | 92.1              | TRKB           | 95.9              | RET           | 98.6              |
| FGFR1         | 78.0              | PKCtheta       | 92.1              | STK33          | 96.2              | PRKX          | 98.6              |
| MEK2          | 78.8              | IRAK4          | 92.4              | WEE1           | 96.2              | GRK7          | 98.6              |
| DDR1          | 79.6              | LTK            | 92.4              | TAOK3          | 96.2              | MARK4         | 98.6              |
| LIMK1         | 79.8              | MELK           | 92.5              | BRSK2          | 96.4              | MST4          | 98.7              |
| MEKK3         | 80.2              | CDK6/cyclin D3 | 92.6              | PKCzeta        | 96.5              | SIK1          | 98.9              |
| NEK7          | 81.3              | CAMK4          | 92.7              | CDK4/cyclin D3 | 96.6              | SGK1          | 98.9              |

| <i>Kinase</i> | <i>% Activity</i> | <i>Kinase</i>  | <i>% Activity</i> | <i>Kinase</i>  | <i>% Activity</i> | <i>Kinase</i>  | <i>% Activity</i> |
|---------------|-------------------|----------------|-------------------|----------------|-------------------|----------------|-------------------|
| CHK2          | 98.9              | INSRR          | 101.4             | SIK3           | 104.0             | MNK2           | 107.3             |
| CDK5/p25      | 98.9              | PIM2           | 101.4             | GRK1           | 104.0             | FER            | 107.5             |
| TBK1          | 99.1              | GRK5           | 101.5             | TIE2           | 104.1             | MAP3K12        | 108.2             |
| AURKB         | 99.1              | ROS1           | 101.5             | AKT3           | 104.2             | RPS6KB2        | 108.2             |
| RPS6KA4       | 99.2              | CDK2/cyclin E  | 101.6             | TGFBR2         | 104.3             | NEK5           | 108.5             |
| WNK1          | 99.2              | CK1d           | 101.6             | SYK            | 104.3             | PLK1           | 108.6             |
| STK39         | 99.2              | PAK6           | 101.7             | JNK2           | 104.3             | FES            | 108.6             |
| PLK2          | 99.2              | EPHA2          | 101.7             | PDGFRb         | 104.3             | PRKD1          | 108.7             |
| CK1g1         | 99.2              | PKCiota        | 101.8             | VRK1           | 104.4             | IKKb           | 109.1             |
| MEKK2         | 99.3              | PKAcg          | 101.8             | LOK            | 104.5             | GRK3           | 109.2             |
| TRKC          | 99.3              | AURKA          | 101.9             | GRK2           | 104.5             | CDK9/cyclin T1 | 109.2             |
| GRK4          | 99.5              | JAK1           | 101.9             | TTBK1          | 104.5             | ROCK1          | 109.7             |
| DAPK2         | 99.5              | CAMK2g         | 101.9             | DAPK1          | 104.6             | FGFR2          | 109.8             |
| ERK2          | 99.5              | CDK7/cyclin H  | 101.9             | PKA            | 104.6             | MLCK           | 109.8             |
| MARK2         | 99.5              | SLK            | 102.0             | EPHA3          | 104.7             | MST3           | 110.0             |
| ASK1          | 99.6              | CDK5/p35       | 102.0             | MST1           | 105.0             | RIPK5          | 110.0             |
| CHK1          | 99.7              | LATS1          | 102.1             | HIPK4          | 105.0             | TGFBR1         | 110.2             |
| NEK6          | 99.7              | TAK1           | 102.1             | SNARK          | 105.0             | TYRO3          | 110.5             |
| MAP4K1        | 99.8              | AURKC          | 102.2             | PRKD3          | 105.0             | PASK           | 110.6             |
| PKCb1         | 99.8              | CDK2/cyclin A  | 102.3             | PLK3           | 105.1             | PKN2           | 110.8             |
| PKCepsilon    | 99.9              | DDR2           | 102.4             | CDK6/cyclin D1 | 105.2             | JAK3           | 111.1             |
| PKCa          | 99.9              | GRK6           | 102.4             | DMPK           | 105.2             | CK1a1          | 111.4             |
| SRPK2         | 100.0             | ALK            | 102.5             | MYO3b          | 105.2             | IR             | 111.8             |
| EPHA6         | 100.1             | STK22D         | 102.5             | ERK1           | 105.2             | TSSK3          | 112.0             |
| MEKK1         | 100.1             | ZAP70          | 102.5             | Haspin         | 105.3             | YSK1           | 112.2             |
| LKB1          | 100.1             | CAMK2d         | 102.5             | WNK2           | 105.4             | PRKD2          | 113.0             |
| STK38L        | 100.1             | DCAMKL2        | 102.5             | MYLK2          | 105.5             | FAK            | 113.5             |
| TRKA          | 100.1             | TNK1           | 102.6             | SGK2           | 105.6             | BRSK1          | 114.7             |
| CLK1          | 100.2             | PKCeta         | 102.7             | MRCKb          | 105.7             | PDGFRa         | 115.1             |
| MARK1         | 100.2             | RSK3           | 102.8             | ACVR1          | 105.7             | EPHB1          | 115.5             |
| MLK3          | 100.2             | NEK4           | 102.8             | NEK1           | 105.9             | STK32C         | 116.0             |
| HIPK1         | 100.3             | DCAMKL1        | 102.8             | TTBK2          | 106.0             | CAMKK2         | 116.7             |
| TLK2          | 100.4             | OSR1           | 103.1             | JNK1           | 106.0             | PLK4           | 116.8             |
| PYK2          | 100.5             | SSTK           | 103.2             | P38-delta      | 106.0             | EGFR           | 117.3             |
| PAK1          | 100.5             | CSF1R          | 103.3             | CDK1/cyclin E  | 106.1             | STK32B         | 118.6             |
| IGF1R         | 100.7             | CAMK2b         | 103.5             | AKT1           | 106.3             | VEGFR2         | 119.5             |
| CLK4          | 100.7             | PAK5           | 103.5             | FLT1           | 106.3             | TSSK2          | 123.4             |
| MEK3          | 100.8             | STK17A         | 103.6             | MAP2K6         | 106.3             | HER2/ERBB2     | 126.3             |
| MARK3         | 101.0             | CAMKK1         | 103.6             | EPHA4          | 106.5             | FLT4           | 127.6             |
| AKT2          | 101.0             | CDK4/cyclin D1 | 103.7             | CDC7/DBF4      | 106.9             | MINK           | 128.9             |
| MYLK3         | 101.1             | ULK2           | 103.8             | MAP2K4         | 107.0             | STK38          | 175.7             |
| DYRK4         | 101.3             | PBK            | 103.9             | PAK4           | 107.0             | CK2a2          | 176.1             |



**Table S5.** Comparison between the kinome inhibition profile eCF506, dasatinib and bosutinib. All kinases with less than 35% activity remaining after compound addition are shown. SRC family kinases are highlighted in red and ABL in blue. Data for dasatinib and bosutinib obtained from Anastassiadis *et al.* assay (12). Note: eCF506 was screened at 1  $\mu$ M, while dasatinib and bosutinib were tested at 500 nM.

| No. | eCF506 |            | Dasatinib |            | Bosutinib |            |
|-----|--------|------------|-----------|------------|-----------|------------|
|     | Kinase | % Activity | Kinase    | % Activity | Kinase    | % Activity |
| 1   | SRC    | 0.1        | FRK       | -0.9       | MAP4K4    | 1.0        |
| 2   | BRK    | 0.2        | EPHB2     | -0.2       | MINK      | 1.2        |
| 3   | HCK    | 0.8        | DDR2      | 0.2        | ERBB4     | 1.5        |
| 4   | FGR    | 1.3        | EPHA5     | 0.2        | MAP4K5    | 1.7        |
| 5   | LYN    | 1.3        | LCK       | 0.3        | ABL       | 1.8        |
| 6   | LCK    | 1.4        | LYN       | 0.4        | LCK       | 1.9        |
| 7   | ARAF   | 1.7        | CSF1R     | 0.8        | SIK2      | 1.9        |
| 8   | YES    | 1.8        | HCK       | 0.8        | LYN       | 2.1        |
| 9   | LYN B  | 2.0        | EPHB3     | 1.0        | ARG       | 2.2        |
| 10  | FYN    | 2.3        | EPHB4     | 1.2        | MAP4K2    | 3.2        |
| 11  | FRK    | 2.4        | TXK       | 1.4        | ACK1      | 3.5        |
| 12  | BMX    | 2.8        | LYN B     | 1.6        | EGFR      | 3.8        |
| 13  | BTK    | 3.8        | EPHA4     | 1.6        | EPHA6     | 4.4        |
| 14  | ERBB4  | 4.5        | FGR       | 1.7        | BTK       | 5.7        |
| 15  | BLK    | 4.8        | PDGFRa    | 1.8        | MST4      | 5.9        |
| 16  | CSK    | 5.0        | SIK2      | 1.9        | LYN B     | 6.0        |
| 17  | TXK    | 9.1        | YES       | 1.9        | SRC       | 6.0        |
| 18  | RIPK3  | 12.1       | FYN       | 2.0        | YES       | 7.3        |
| 19  | RAF1   | 19.6       | BTK       | 2.1        | MST1      | 7.4        |
| 20  | ARG    | 28.7       | PDGFRb    | 2.5        | MEK2      | 8.4        |
| 21  | LIMK2  | 30.0       | BMX       | 2.5        | NEK2      | 8.6        |
| 22  | MER    | 30.1       | ACK1      | 2.6        | EPHA2     | 9.6        |
| 23  | BRAF   | 35.5       | EPHA1     | 2.7        | PAK3      | 9.9        |
| 24  | TEC    | 43.9       | ARG       | 2.7        | YSK1      | 10.1       |
| 25  | SRMS   | 46.2       | ABL       | 2.8        | EPHA8     | 10.5       |
| 26  |        |            | BLK       | 3.0        | CK1d      | 10.9       |
| 27  |        |            | MAP4K5    | 3.1        | MST3      | 11.0       |
| 28  |        |            | pdg       | 3.3        | ARK5      | 11.4       |
| 29  |        |            | EPHA3     | 3.5        | CK1e      | 11.4       |
| 30  |        |            | SRC       | 3.5        | FGR       | 11.5       |
| 31  |        |            | ERBB4     | 4.0        | PAK1      | 11.7       |
| 32  |        |            | EPHA8     | 4.1        | MAP3K3    | 11.8       |
| 33  |        |            | BRK       | 4.6        | EPHB1     | 11.8       |
| 34  |        |            | EPHB1     | 4.8        | HCK       | 11.9       |
| 35  |        |            | EPHA2     | 6.8        | CSK       | 12.3       |
| 36  |        |            | CSK       | 7.1        | EPHB4     | 12.5       |
| 37  |        |            | ZAK       | 8.6        | LOK       | 12.6       |
| 38  |        |            | TEC       | 11.3       | MLK3      | 13.5       |
| 39  |        |            | ALK1      | 15.9       | MST2      | 13.9       |
| 40  |        |            | LIMK1     | 16.7       | BMX       | 14.5       |
| 41  |        |            | SRMS      | 17.0       | NEK1      | 15.2       |
| 42  |        |            | EGFR      | 21.1       | TRKC      | 15.2       |
| 43  |        |            | NEK11     | 21.7       | MLK1      | 16.5       |

|    |  |        |       |           |       |
|----|--|--------|-------|-----------|-------|
| 44 |  | RIPK2  | 25.2  | CAMK1d    | 16.6  |
| 45 |  | NLK    | 27.5  | EPHB2     | 17.4  |
| 46 |  | ARAF   | 33.8  | RET       | 18.9  |
| 47 |  | MAPK14 | 36.53 | BLK       | 20.7  |
| 48 |  | RAF1   | 39.66 | SYK       | 21.1  |
| 49 |  | RET    | 45.99 | SLK       | 21.6  |
| 50 |  | MINK1  | 46.54 | CHK2      | 21.7  |
| 51 |  | MAP4K4 | 49.20 | MLK2      | 22.9  |
| 52 |  |        |       | MAP3K2    | 23.5  |
| 53 |  |        |       | MELK      | 25.8  |
| 54 |  |        |       | EPHA4     | 27.0  |
| 55 |  |        |       | TXK       | 27.5  |
| 56 |  |        |       | TAK1      | 28.3  |
| 57 |  |        |       | MER       | 28.9  |
| 58 |  |        |       | FRK       | 29.2  |
| 59 |  |        |       | FYN       | 29.4  |
| 60 |  |        |       | LRRK2     | 30.1  |
| 61 |  |        |       | FLT3      | 30.3  |
| 62 |  |        |       | EPHA3     | 31.7  |
| 63 |  |        |       | MYLK2     | 32.1  |
| 64 |  |        |       | PYK2      | 32.6  |
| 65 |  |        |       | NEK4      | 32.6  |
| 66 |  |        |       | ERBB2     | 32.9  |
| 67 |  |        |       | PRKD2     | 35.54 |
| 68 |  |        |       | FES/FPS   | 35.71 |
| 69 |  |        |       | IRR/INSRR | 36.90 |
| 70 |  |        |       | EPHA5     | 37.14 |
| 71 |  |        |       | AXL       | 37.63 |
| 72 |  |        |       | CHK1      | 38.90 |
| 73 |  |        |       | PKCd      | 40.27 |
| 74 |  |        |       | MYO3b     | 40.28 |
| 75 |  |        |       | WEE1      | 40.47 |
| 76 |  |        |       | PRKD3     | 42.25 |
| 77 |  |        |       | FMS       | 43.09 |
| 78 |  |        |       | PRKD1     | 43.71 |
| 79 |  |        |       | FLT4      | 44.10 |
| 80 |  |        |       | RSK3      | 44.20 |
| 81 |  |        |       | FLT1      | 44.54 |
| 82 |  |        |       | TYRO3     | 47.75 |
| 83 |  |        |       | EPHB3     | 49.42 |
| 84 |  |        |       | PKCa      | 49.46 |
| 85 |  |        |       | CK1a1     | 49.52 |

**Table S6.** Summary of clinical scores in acute toxicity study in Swiss mice. Clinical scores describe the number of adverse effects observed at different time points. Vehicle group received the same vehicle concentration as eCF506-treated mice. No clinical signs were recorded for mice treated with 200 mg/kg during this observation period. Clinical signs were observed at 300 mg/kg only for the male group, including slight drop in body temperature and presence of blood in the perianal region. Slight loss of body weight was recorded for 2/3 male mice and one mouse presented hypoactivity. Necropsy examination revealed hyperemia of the digestive track only in male animals. Interestingly, the female group showed no clinical signs after a single dose at 300 or 400 mg/Kg, which may indicate that exposure to eCF506 is slightly different in male and female mice. The single oral administration study in mice concluded: 200 mg/Kg < MTD < 300 mg/kg for male and MTD > 400 mg/Kg for female.

| Group    | Sex          | Female  |   |   |     |   |   |     |   |   |     |   |   | Male    |   |     |   |     |   |   |   |   |
|----------|--------------|---------|---|---|-----|---|---|-----|---|---|-----|---|---|---------|---|-----|---|-----|---|---|---|---|
|          | Dose (mg/kg) | Vehicle |   |   | 200 |   |   | 300 |   |   | 400 |   |   | Vehicle |   | 200 |   | 300 |   |   |   |   |
| Time (h) | 0            | 0       | 0 | 0 | 0   | 0 | 0 | 0   | 0 | 0 | 0   | 0 | 0 | 0       | 0 | 0   | 0 | 0   | 0 | 0 | 0 | 0 |
|          | 1            | 0       | 0 | 0 | 0   | 0 | 0 | 0   | 0 | 0 | 0   | 0 | 0 | 0       | 0 | 0   | 0 | 0   | 0 | 0 | 0 | 0 |
|          | 2            | 0       | 0 | 0 | 0   | 0 | 0 | 0   | 0 | 0 | 0   | 0 | 0 | 0       | 0 | 0   | 0 | 0   | 0 | 0 | 2 | 0 |
|          | 4            | 0       | 0 | 0 | 0   | 0 | 0 | 0   | 0 | 0 | 0   | 0 | 0 | 0       | 0 | 0   | 0 | 0   | 0 | 0 | 3 | 0 |
|          | 6            | 0       | 0 | 0 | 0   | 0 | 0 | 0   | 0 | 0 | 0   | 0 | 0 | 0       | 0 | 0   | 0 | 0   | 0 | 0 | 3 | 0 |
|          | 8            | 0       | 0 | 0 | 0   | 0 | 0 | 0   | 0 | 0 | 0   | 0 | 0 | 0       | 0 | 0   | 0 | 0   | 0 | 1 | 2 | 1 |
|          | 24           | 0       | 0 | 0 | 0   | 0 | 0 | 0   | 0 | 0 | 0   | 0 | 0 | 0       | 0 | 0   | 0 | 0   | 0 | 1 | 2 | 0 |

**Table S7.** Summary of clinical scores in acute toxicity study in Sprague-Dawley rats. Clinical scores describe the number of adverse effects observed at different time points. Vehicle group 1 received the same vehicle concentration as mice treated with 200 mg/kg or 400 mg/kg eCF506, while vehicle group 2 received the same vehicle concentration as mice treated with 700 mg/kg eCF506. As shown in the table, the study provided similar results in both genders, with no clinical signs after single oral dose at 400 mg/Kg. Animals showed adverse effects only when dosed with 700 mg/Kg of eCF506, clinical signs that were equivalent to those observed in male mice treated with 300 mg/Kg of inhibitor.

| Group    | Sex          | Female    |   |   |           |   |   |     |   |   | Male |   |   |     |   |   |           |   |   |           |   |   |     |   |   |     |   |   |     |   |   |   |
|----------|--------------|-----------|---|---|-----------|---|---|-----|---|---|------|---|---|-----|---|---|-----------|---|---|-----------|---|---|-----|---|---|-----|---|---|-----|---|---|---|
|          | Dose (mg/kg) | Vehicle 1 |   |   | Vehicle 2 |   |   | 200 |   |   | 400  |   |   | 700 |   |   | Vehicle 1 |   |   | Vehicle 2 |   |   | 200 |   |   | 400 |   |   | 700 |   |   |   |
| Time (h) | 0            | 0         | 0 | 0 | 0         | 0 | 0 | 0   | 0 | 0 | 0    | 0 | 0 | 0   | 0 | 0 | 0         | 0 | 0 | 0         | 0 | 0 | 0   | 0 | 0 | 0   | 0 | 0 | 0   | 0 | 0 | 0 |
|          | 1            | 0         | 0 | 0 | 0         | 0 | 0 | 0   | 0 | 0 | 0    | 0 | 0 | 0   | 0 | 0 | 0         | 0 | 0 | 0         | 0 | 0 | 0   | 0 | 0 | 0   | 0 | 0 | 0   | 0 | 0 | 0 |
|          | 2            | 0         | 0 | 0 | 0         | 0 | 0 | 0   | 4 | 3 | 0    | 0 | 0 | 0   | 0 | 0 | 0         | 0 | 0 | 0         | 0 | 0 | 0   | 0 | 0 | 0   | 0 | 2 | 0   | 0 | 0 |   |
|          | 4            | 0         | 0 | 0 | 0         | 0 | 0 | 0   | 4 | 5 | 0    | 0 | 0 | 0   | 0 | 0 | 0         | 0 | 0 | 0         | 0 | 0 | 0   | 0 | 0 | 0   | 0 | 3 | 4   | 0 | 0 |   |
|          | 6            | 0         | 0 | 0 | 0         | 0 | 0 | 0   | 1 | 1 | 0    | 0 | 0 | 0   | 0 | 0 | 0         | 0 | 0 | 0         | 0 | 0 | 0   | 0 | 0 | 0   | 0 | 1 | 0   | 0 | 0 |   |
|          | 8            | 0         | 0 | 0 | 0         | 0 | 0 | 0   | 1 | 1 | 0    | 0 | 0 | 0   | 0 | 0 | 0         | 0 | 0 | 0         | 0 | 0 | 0   | 0 | 0 | 0   | 0 | 2 | 0   | 0 | 0 |   |
|          | 24           | 0         | 0 | 0 | 0         | 0 | 0 | 0   | 1 | 1 | 0    | 0 | 0 | 0   | 0 | 0 | 0         | 0 | 0 | 0         | 0 | 0 | 0   | 0 | 0 | 0   | 0 | 1 | 1   | 0 | 0 |   |

## SUPPLEMENTARY FIGURES

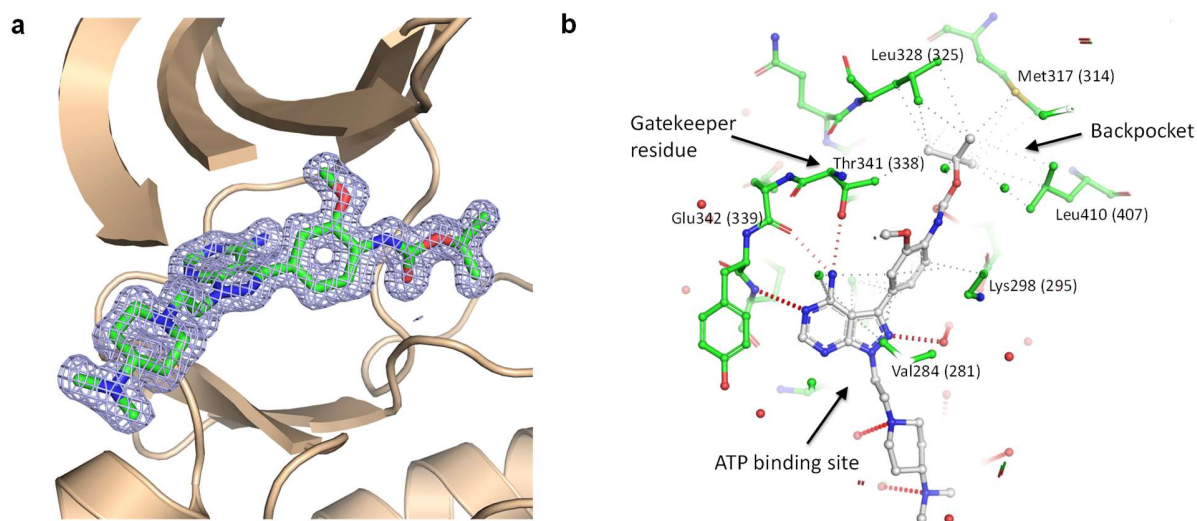

**Figure S1. eCF506 binds the ATP binding site of the SRC protein kinase domain in its inactive conformation. (a)** 2Fo-Fc Electron density map counteracted at  $1\sigma$  (blue mesh) is shown around eCF506. As observed in the image, the entire structure of eCF506 is well defined in the electron density maps. **(b)** Main interactions of eCF506 bound to the SRC kinase domain. Red dotted lines = H-bonds. Grey dotted lines = hydrophobic contacts. Amino acid numbering corresponds to human SRC (chicken c-Src numbering given between parentheses). The *tert*-butyl group of eCF506 is deeply buried in a hydrophobic back-pocket only formed in the C-helix-out conformation by M317, L328, I339, F408 and L410. Further, a total of six H-bonds keep a tight grip on eCF506, four of them directly formed with the backbones of E342, M344, D407 and the side chain of T341 and two indirectly via water molecules with the side chain of K298 and the main chain of S348.

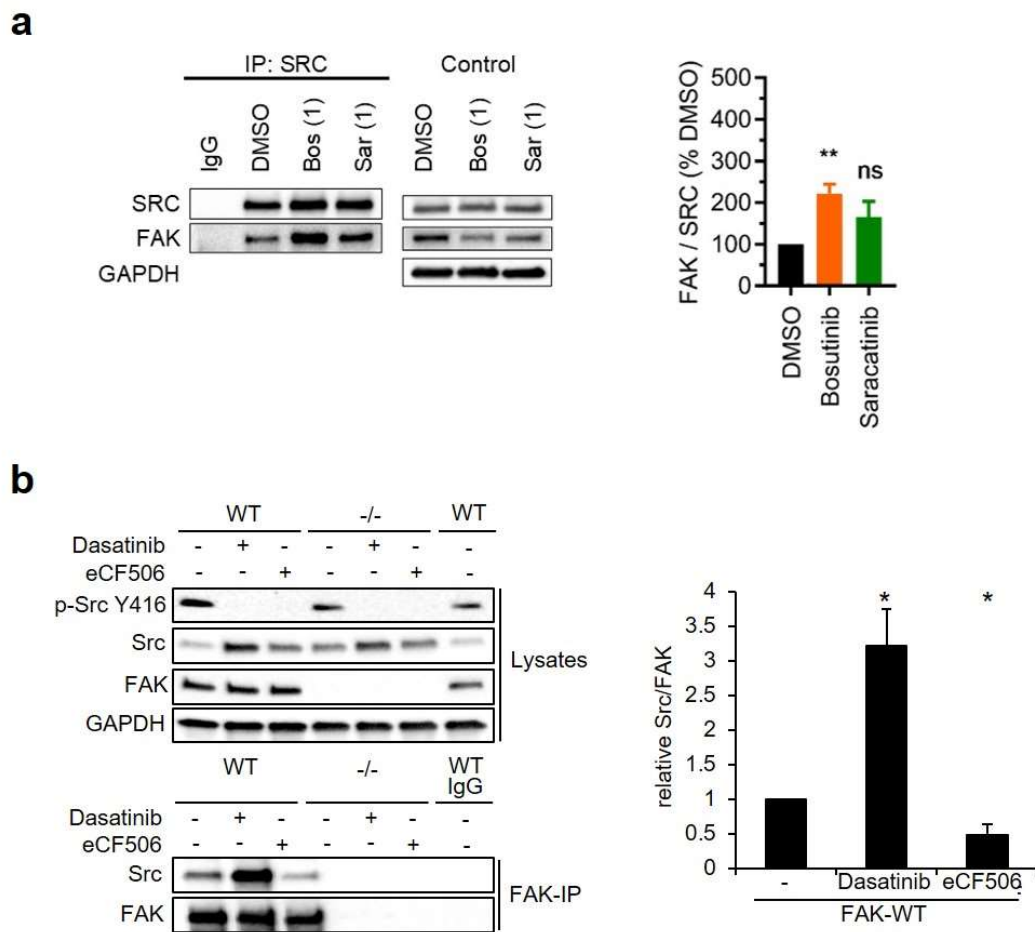

**Figure S2. Co-immunoprecipitation studies after drug treatment. (a)** MDA-MB-231 cells were treated with bosutinib (1  $\mu$ M) or saracatinib (1  $\mu$ M) for 6 h prior to cell lysis and co-immunoprecipitation using SRC antibody overnight. Bound proteins were eluted and analyzed using Western blot with total cell lysates as control. Band intensities were quantified using Bio-Rad ImageLab® software, adjusted for loading by calculating FAK / SRC ratio and normalized to DMSO. Left: Representative Western blots. Right: Summary graph of three biological replicates with standard deviation. \*\* P < 0.01 (t-test). **(b)** Murine SCC cells were treated with dasatinib (0.1  $\mu$ M) or eCF506 (0.1  $\mu$ M) following the same protocol as before but co-immunoprecipitating with FAK antibody. Bound proteins were eluted and analyzed using Western blot with cell lysates of SCC FAK<sup>-/-</sup> cells as a negative control. Left: Representative Western blots. Right: Summary graph showing the quantification of the FAK-IP from three biological replicates with standard deviation. \* P < 0.05 (t-test).

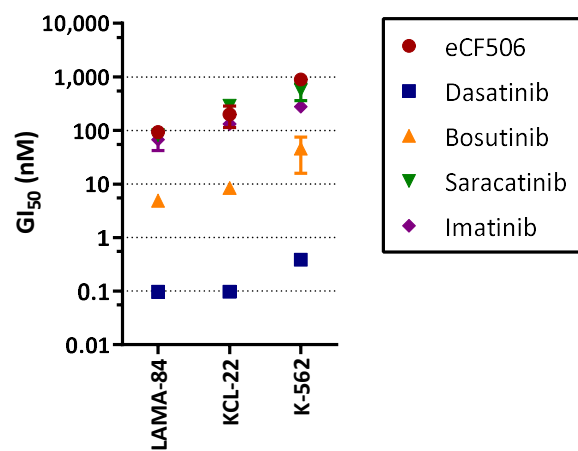

**Figure S3.** Antiproliferative activities of eCF506, dasatinib, bosutinib, saracatinib and imatinib across three CML cell lines. Viability was tested at day 5 using PrestoBlue. Error bar:  $\pm$ SD, n=3.

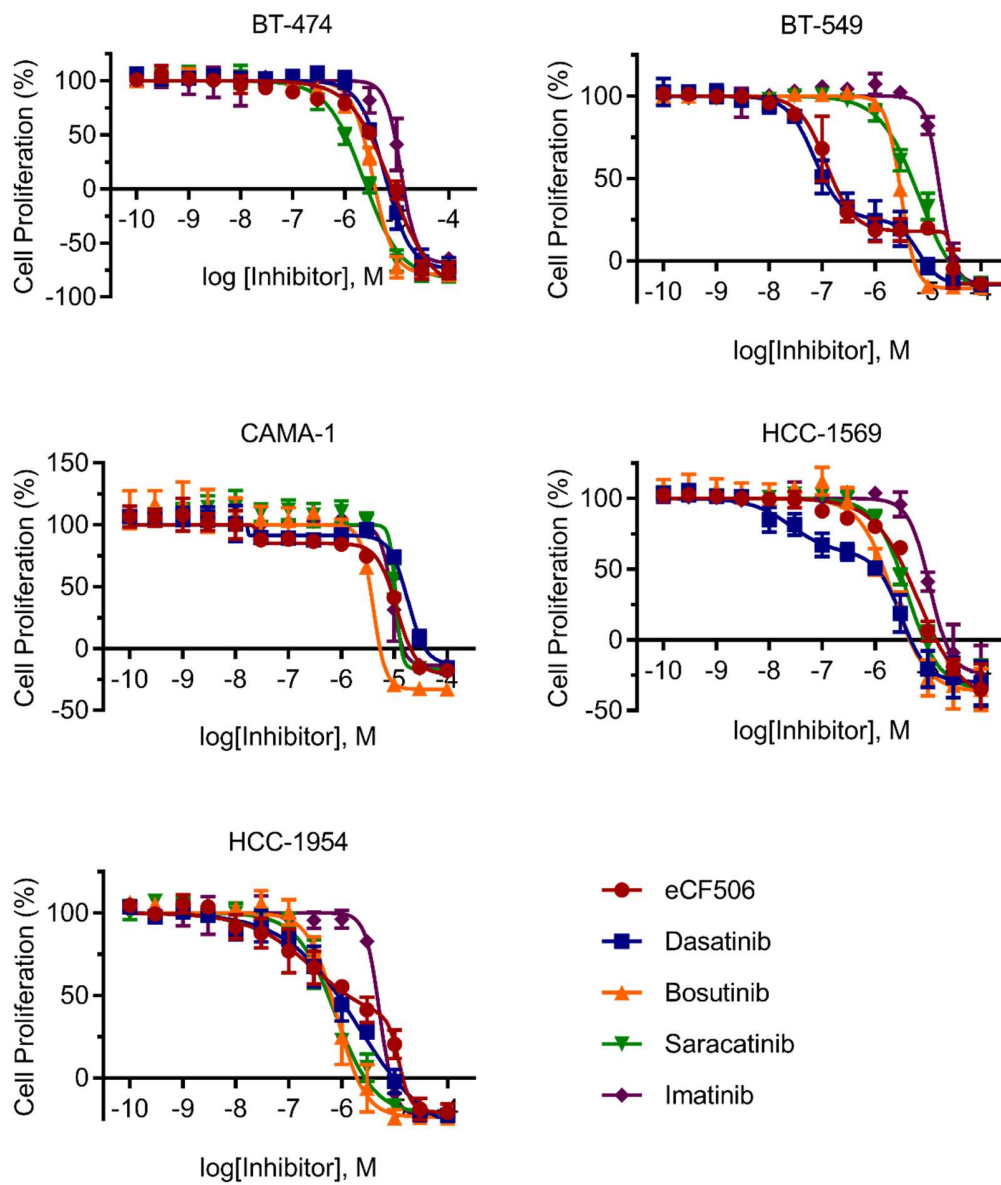

Figure continued on next page



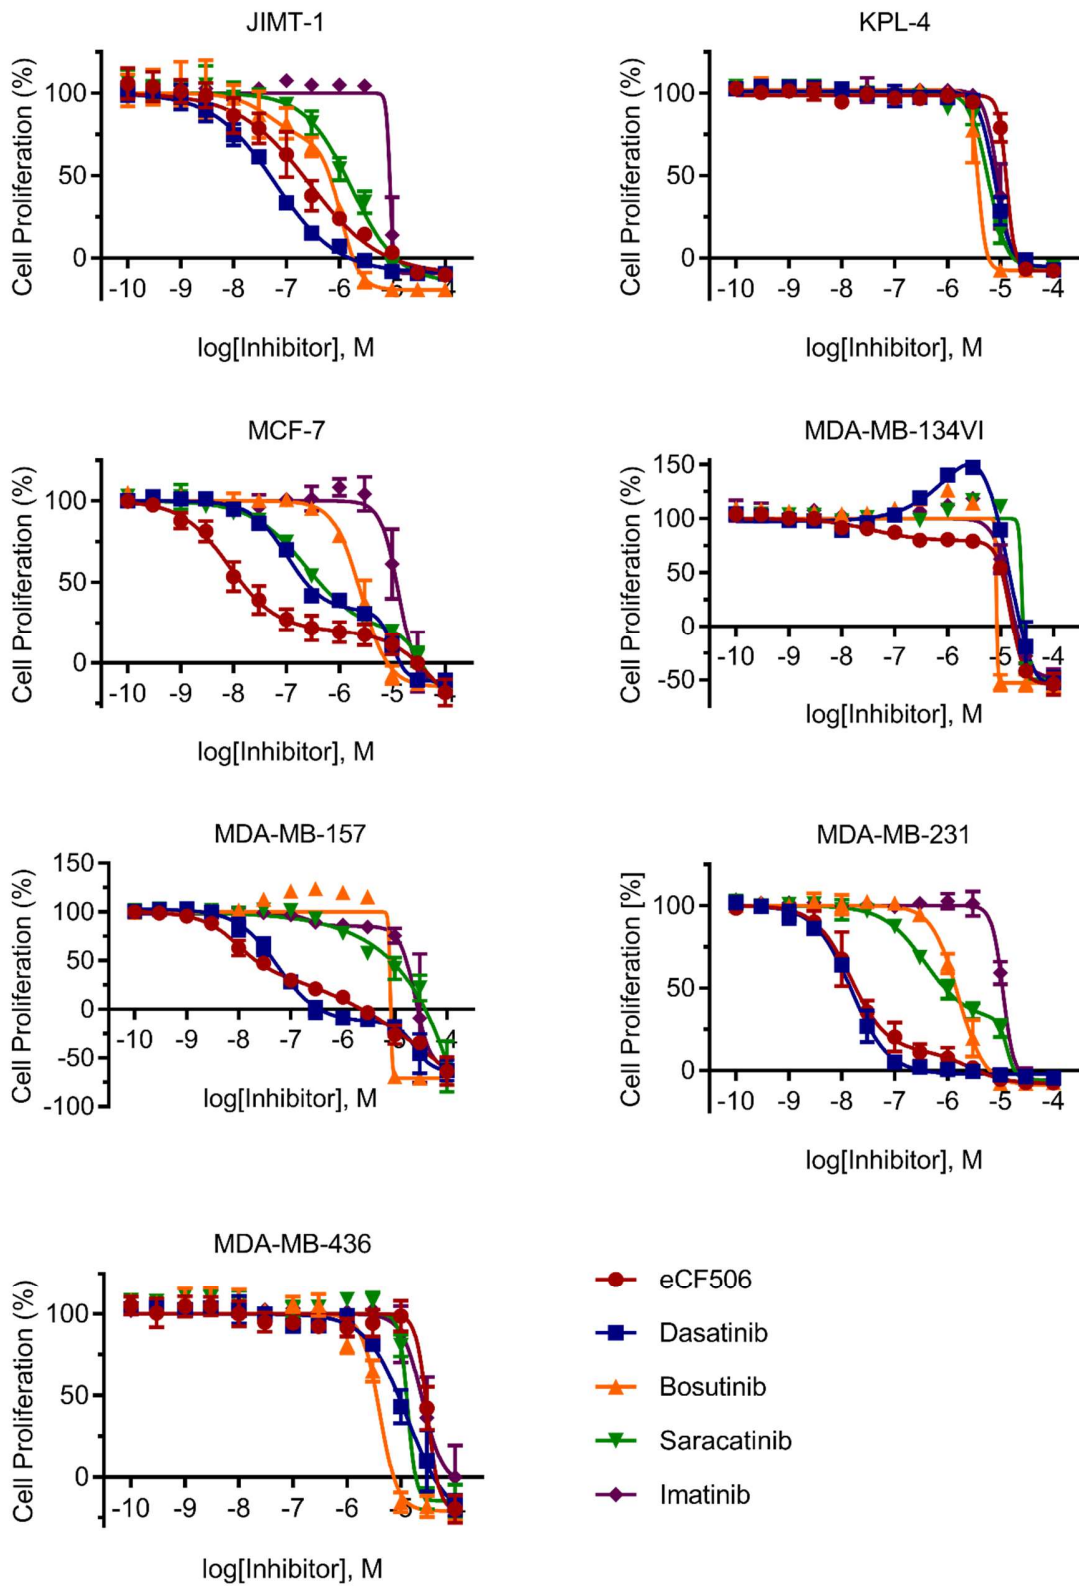

Figure continued on next page

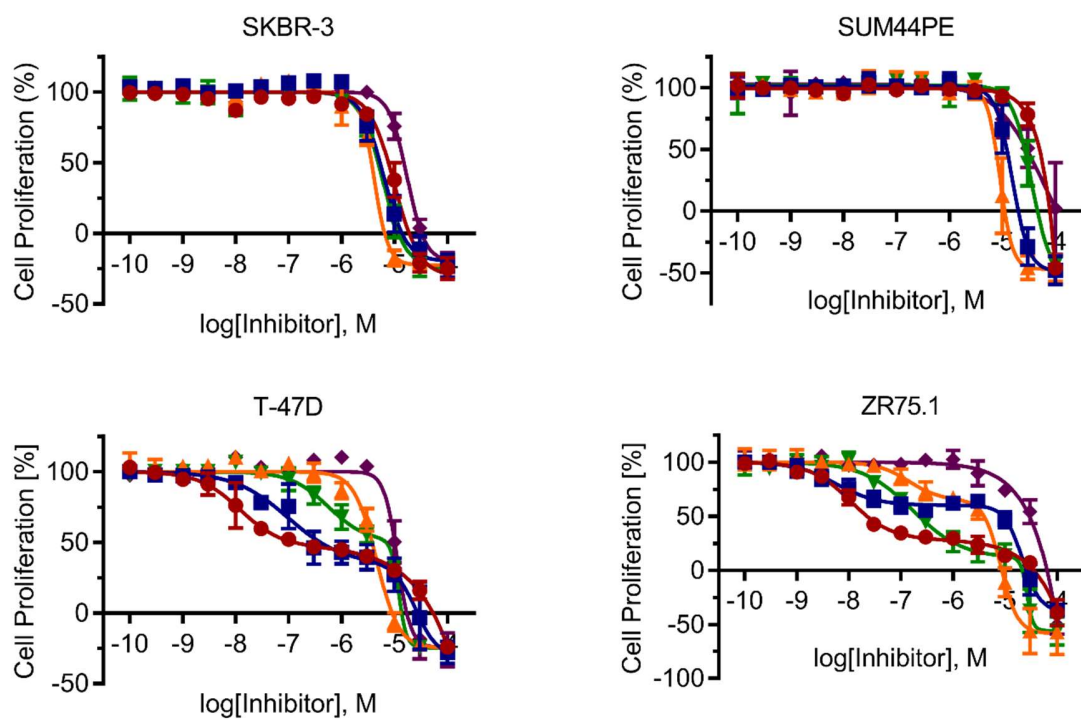

| Calculated GI <sub>50</sub> | Source | Type | Subtype (Subgroup)   | eCF506 GI <sub>50</sub> (in μM) | Dasatinib GI <sub>50</sub> (in μM) | Bosutinib GI <sub>50</sub> (in μM) | Saracatinib GI <sub>50</sub> (in μM) | Imatinib GI <sub>50</sub> (in μM) |
|-----------------------------|--------|------|----------------------|---------------------------------|------------------------------------|------------------------------------|--------------------------------------|-----------------------------------|
| <b>Breast Cancer</b>        |        |      |                      |                                 |                                    |                                    |                                      |                                   |
| <b>BT-474</b>               | PBr    | DC   | HER2+ (HER2)         | 2.99 (0.287)                    | 3.56 (0.430)                       | 2.25 (0.187)                       | 1.05 (0.250)                         | 8.80 (2.46)                       |
| <b>BT-549</b>               | PBr    | DC   | TNBC (Basal B)       | 0.155 (0.0564)                  | 0.115 (0.0406)                     | 2.78 (0.159)                       | 5.07 (1.07)                          | 15.7 (2.41)                       |
| <b>CAMA-1</b>               | PE     | AC   | ER+ (Luminal A)      | 8.75 (0.464)                    | 15.6 (0.938)                       | 3.49 (0.103)                       | 10.3 (0.831)                         | 8.64 (2.16)                       |
| <b>HCC-1569</b>             | PBr    | MC   | HER2+ (Basal A-HER2) | 3.59 (0.352)                    | 1.17 (0.378)                       | 1.49 (0.422)                       | 2.81 (0.392)                         | 8.84 (1.17)                       |
| <b>HCC-1954</b>             | PBr    | DC   | HER2+ (Basal A-HER2) | 1.79 (0.446)                    | 0.879 (0.341)                      | 0.665 (0.196)                      | 0.568 (0.149)                        | 4.65 (0.204)                      |
| <b>JIMT-1</b>               | PE     | DC   | HER2+ (HER2)         | 0.222 (0.141)                   | 0.0484 (0.0119)                    | 0.638 (0.180)                      | 1.33 (0.368)                         | 8.92 (0.929)                      |
| <b>KPL-4</b>                | PE     | DC   | HER2+ (HER2)         | 12.8 (1.07)                     | 7.66 (0.643)                       | 3.60 (0.516)                       | 5.79 (0.911)                         | 8.52 (1.64)                       |
| <b>MCF-7</b>                | PE     | AC   | ER+ (Luminal A)      | 0.0147 (0.00431)                | 0.229 (0.0156)                     | 2.26 (0.572)                       | 0.398 (0.0504)                       | 12.7 (4.85)                       |
| <b>MDA-MB-134VI</b>         | PE     | LC   | ER+ (Luminal A)      | 10.4 (0.323)                    | 14.1 (2.39)                        | 7.97 (0.148)                       | 24.9 (0.673)                         | 12.1 (2.03)                       |

|                   |    |    |                      |                     |                     |                 |                   |                 |
|-------------------|----|----|----------------------|---------------------|---------------------|-----------------|-------------------|-----------------|
| <b>MDA-MB-157</b> | PE | M  | TNBC<br>(Basal B)    | 0.0200<br>(0.00281) | 0.0486<br>(0.0143)  | 7.61<br>(0.189) | 6.83<br>(1.38)    | 21.3<br>(14.1)  |
| <b>MDA-MB-231</b> | PE | AC | TNBC<br>(Basal B)    | 0.0160<br>(0.00498) | 0.0169<br>(0.00350) | 1.45<br>(0.206) | 0.983<br>(0.307)  | 10.7<br>(0.284) |
| <b>MDA-MB-436</b> | PE | AC | TNBC<br>(Basal B)    | 27.0<br>(3.13)      | 9.33<br>(3.67)      | 3.42<br>(0.428) | 12.6<br>(1.35)    | 27.5<br>(11.2)  |
| <b>SKBR-3</b>     | PE | AC | HER2+<br>(HER2)      | 7.80<br>(1.21)      | 5.49<br>(0.366)     | 3.65<br>(0.382) | 4.99<br>(0.402)   | 15.2<br>(2.61)  |
| <b>SUM44PE</b>    | PE | LC | HER2+<br>(Luminal B) | 50.8<br>(7.66)      | 12.7<br>(4.15)      | 7.87<br>(2.28)  | 26.9<br>(5.81)    | 39.8<br>(20.0)  |
| <b>T-47D</b>      | PE | DC | ER+<br>(Luminal A)   | 0.149<br>(0.0983)   | 0.497<br>(0.363)    | 3.70<br>(0.500) | 3.46<br>(0.729)   | 10.4<br>(1.40)  |
| <b>ZR75.1</b>     | A  | DC | ER+<br>(Luminal A)   | 0.0218<br>(0.00223) | 11.2<br>(5.09)      | 4.04<br>(0.693) | 0.248<br>(0.0687) | 28.7<br>(3.90)  |

**Figure S4. Dose-response curves and calculated GI<sub>50</sub> values.** Dose-response curves of 16 human breast cancer cell lines treated with different SRC/ABL kinase inhibitors for 5 days. Effects on cell proliferation were measured using PrestoBlue™ reagent and curves were fitted using GraphPad Prism 7. Fluorescence intensity readings on the day of treatment was subtracted from final readings and results were normalized to DMSO treated control. All dose-response curves represent the average of three biological repeats with standard deviation in brackets.

Breast cancer sources: PBr = primary breast, PE = pleural effusion, A = ascites. Breast cancer type: AC = adenocarcinoma, DC = ductal carcinoma, MC = metaplastic carcinoma, M = medullary carcinoma, LC = lobular carcinoma.

Breast cancer subtypes: HER2+ = HER2 amplified, ER+ = oestrogen receptor expressing, TNBC = triple negative breast cancer lacking ER, PrR and HER2.

Breast cancer subgroups: Luminal A (ER+, PR±, HER2-, Ki67 low), Luminal B (ER+, PR±, HER2+, Ki67 high), Basal A (luminal-like), Basal B (basal-like, claudin-low), HER2 (ER-, PR-, HER2 amplified).

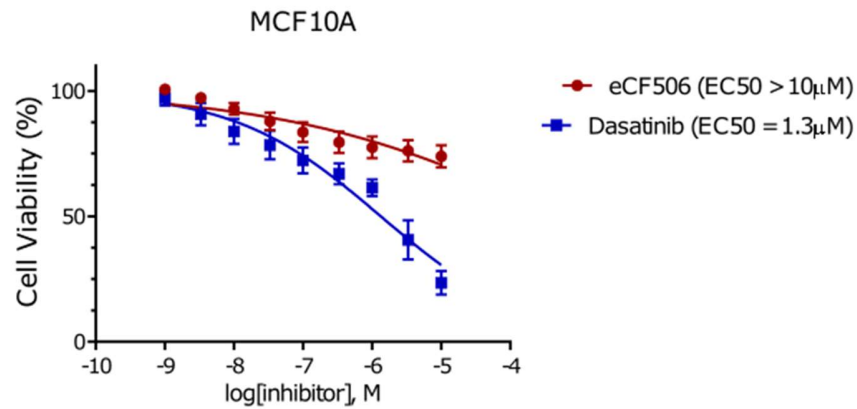

**Figure S5. Effect of SRC inhibition on non-malignant breast epithelial cells.** Dose-response curves of human non-malignant breast epithelial cell MCF10A after treatment with eCF506 or dasatinib for 5 d. Effects on cell proliferation were measured using PrestoBlue™ reagent and curves were fitted using GraphPad Prism 7. Fluorescence intensity readings on the day of treatment was subtracted from final readings and results were normalized to DMSO treated control. Error bar:  $\pm$ SD, n=3.

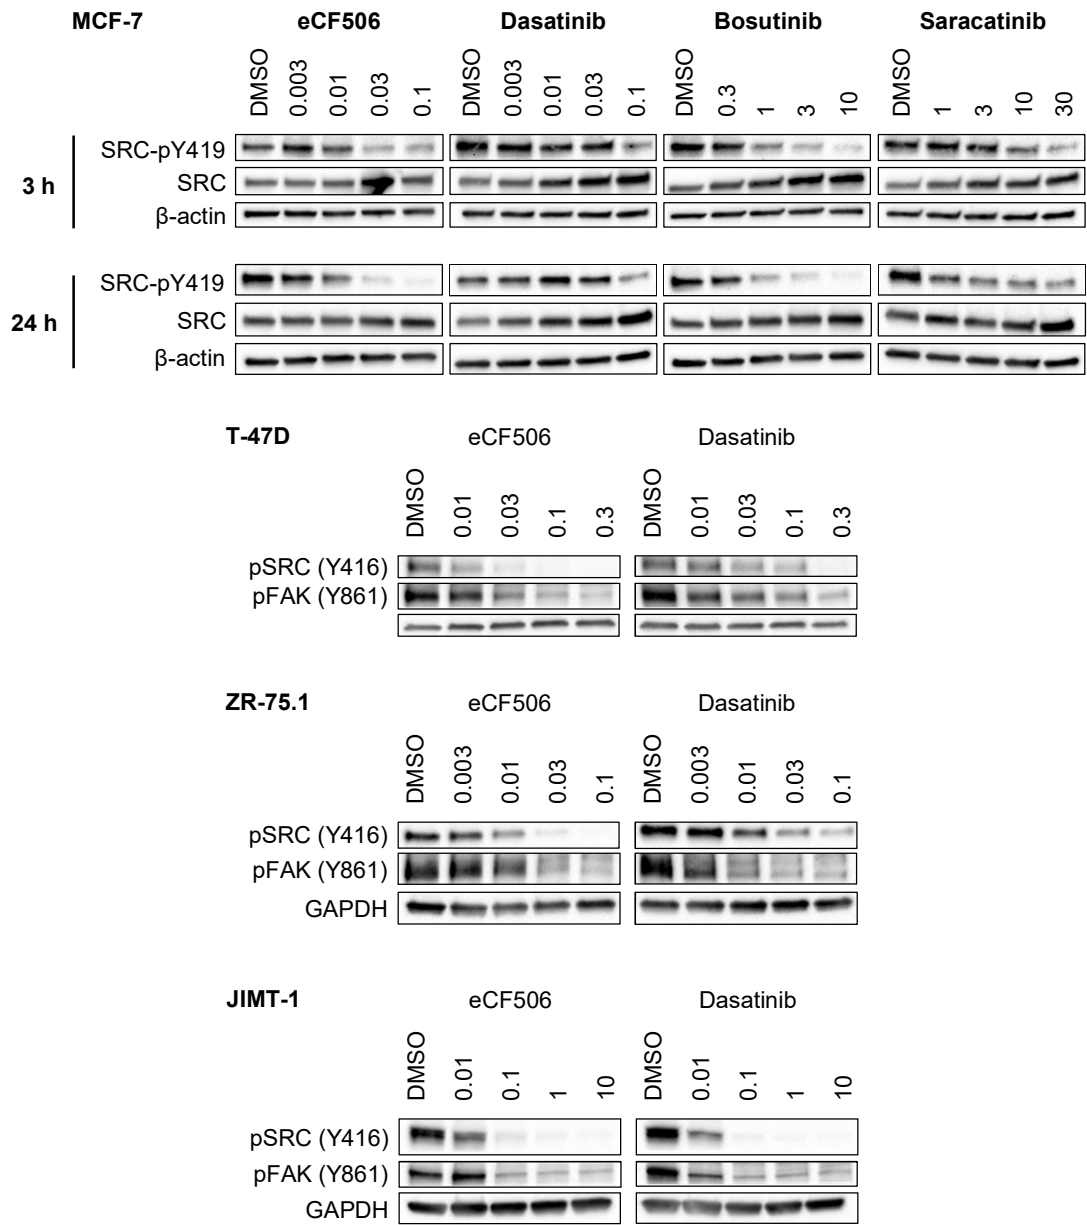

**Figure S6.** Western blot analysis of eCF506 and clinical SRC inhibitors in ER+ MCF-7, T-47D and ZR-75.1 cells and HER2+ JIMT-1 cells. Cell lines were treated with the inhibitors for 24 h prior to cell lysis and analysis by Western blot. Concentrations are in  $\mu\text{M}$ .

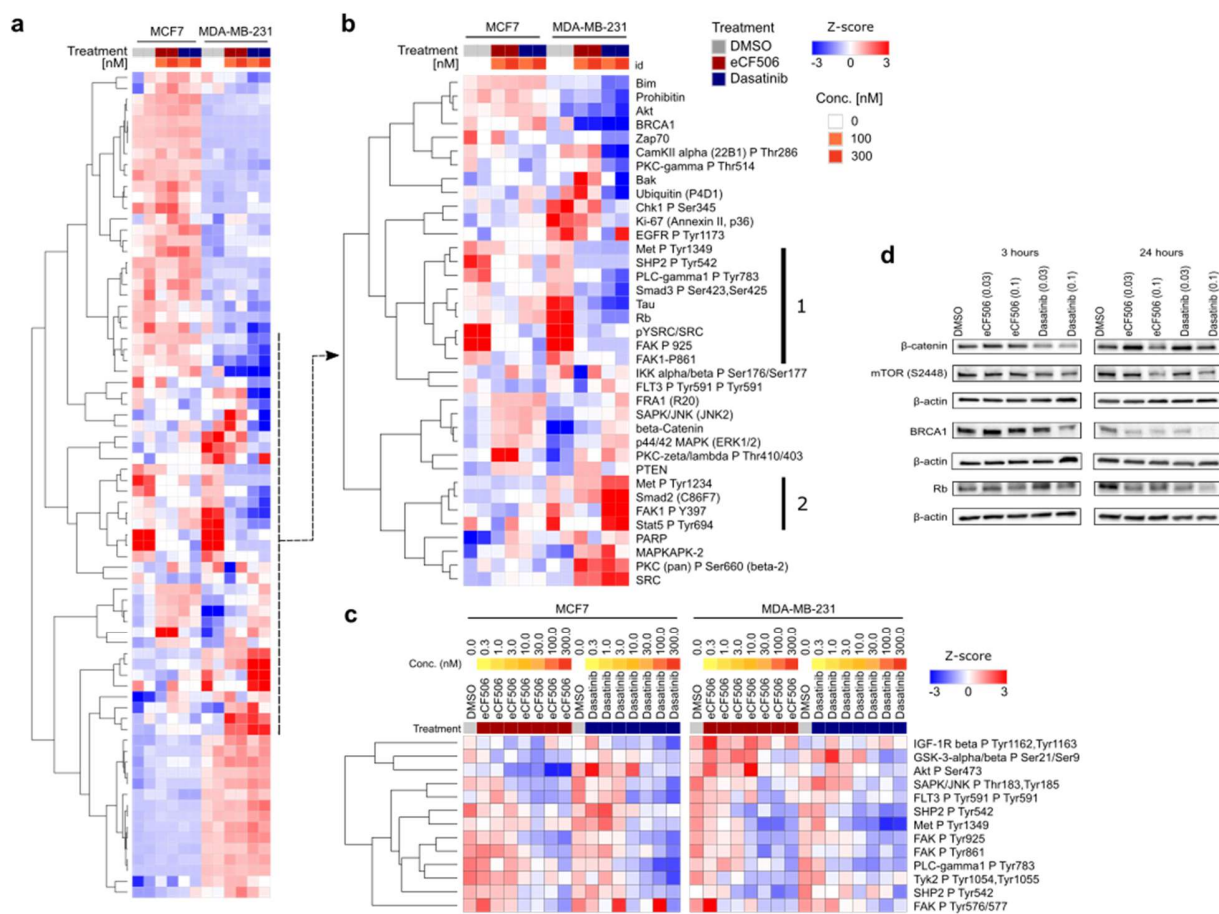

**Figure S7. (a,b)** Hierarchical clustering analysis of the RPPA study in MCF-7 and MDA-MB-231 cells after 24 h treatment with eCF506 or dasatinib. Most relevant changes and antibody labels identified are compiled in **b**. **(c)** Analysis of 13 phosphorylated proteins after 3 h treatment with eCF506 or dasatinib at a range of concentrations. **(d)** Western blot analysis of selected proteins assessed in the RPPA. MDA-MB-231 cells were treated with eCF506 or dasatinib for the time specified prior to lysis and analysis by Western blot. Images represent one biological replicate. Concentrations given in  $\mu\text{M}$ .

**Highlights of the proteomics analysis.** The MCF-7 and MDA-MB-231 cell lines exhibited characteristic differences in protein expression, for example, no caspase 3 present in MCF-7 cells and no E-cadherin in MDA-MB-231 cells. An overall increase in pro-apoptotic protein BAK and PTEN was observed in MDA-MB-231 cells treated with eCF506 but not with dasatinib, whereas dasatinib increased  $\beta$ -catenin in this cell line and eCF506 did not. Decrease of BRCA1 and Rb proteins was observed in MDA-MB-231 cells after 24 h of treatment with both compounds. Reduced expression of BRCA1 and Rb protein was also observed in MCF-7 cells after treatment with eCF506 (Figure S7b, group 1), but dasatinib increased the levels of both proteins in this cell line. These contrasting effects in proteins that regulate the cell cycle may be related to the superior antiproliferative potency of eCF506 in MCF-7 cells. Increased levels of PKC $\zeta$ / $\lambda$ -pT410/403 was also detected in cells treated with eCF506 but not with dasatinib.

Fig. S7c shows dose response changes on 13 phosphorylated proteins that have been proposed to belong to the interaction network of the SRC-FAK axis (*15-21*). Similar change trends were observed for both dasatinib and eCF506, showing the wider inhibition of signaling networks due to SRC inhibition.

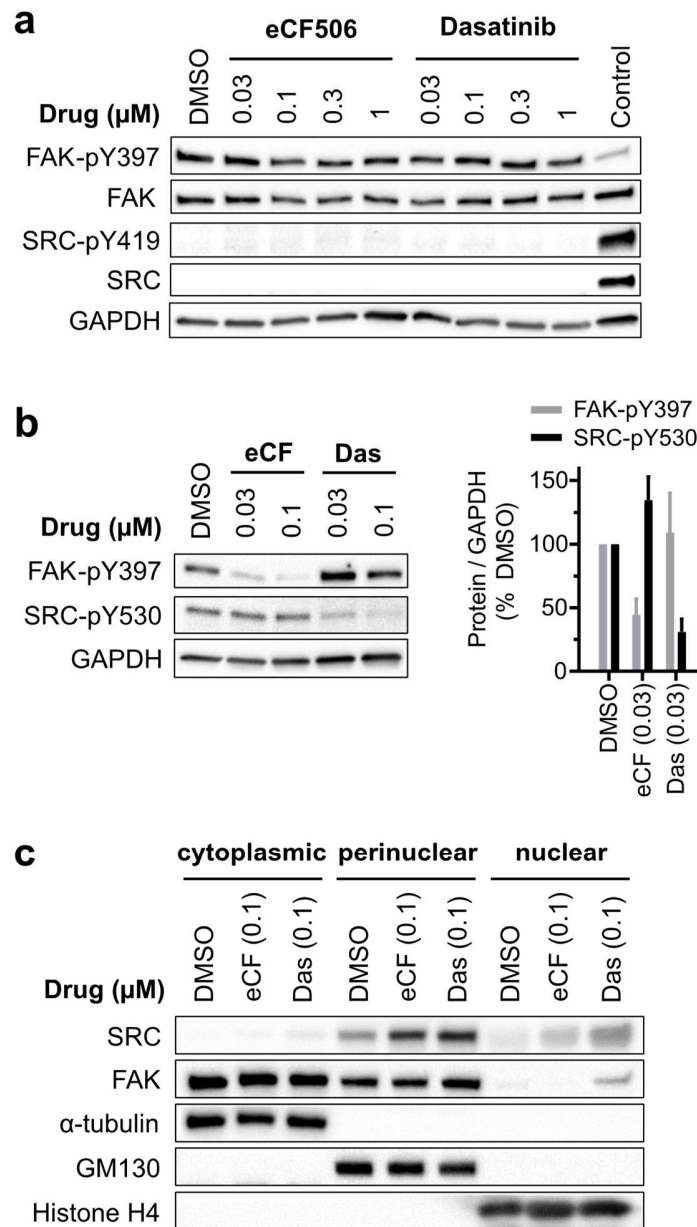

**Figure S8. (a)** Analysis of FAK autophosphorylation after treating SYF ( $\text{SRC}^{-/-}$ ,  $\text{YES}^{-/-}$ ,  $\text{FYN}^{-/-}$ ) cells for 24 h with eCF506 or dasatinib. DMSO-treated MDA-MB-231 cells and analysis of total SRC and SRC-pY419 were used as controls. Representative Western blots from n = 3. **(b)** Representative Western blots of FAK-pY397 and SRC-pY530 after treating MDA-MB-231 cells with eCF506 or dasatinib for 3 h. Quantitative analysis of FAK-pY397 and SRC-pY530 levels normalized to DMSO after treatment with 0.03  $\mu\text{M}$  of each inhibitor from n = 3 is shown on the right. Error bars:  $\pm$  SD. **(c)** Subcellular localization study of SRC and FAK in MDA-MB-231 cells after treatment with eCF506 or dasatinib for 6 h.  $\alpha$ -tubulin, GM130 and histone H4 were used as subcellular fractionation controls. Representative Western blots from n = 3.



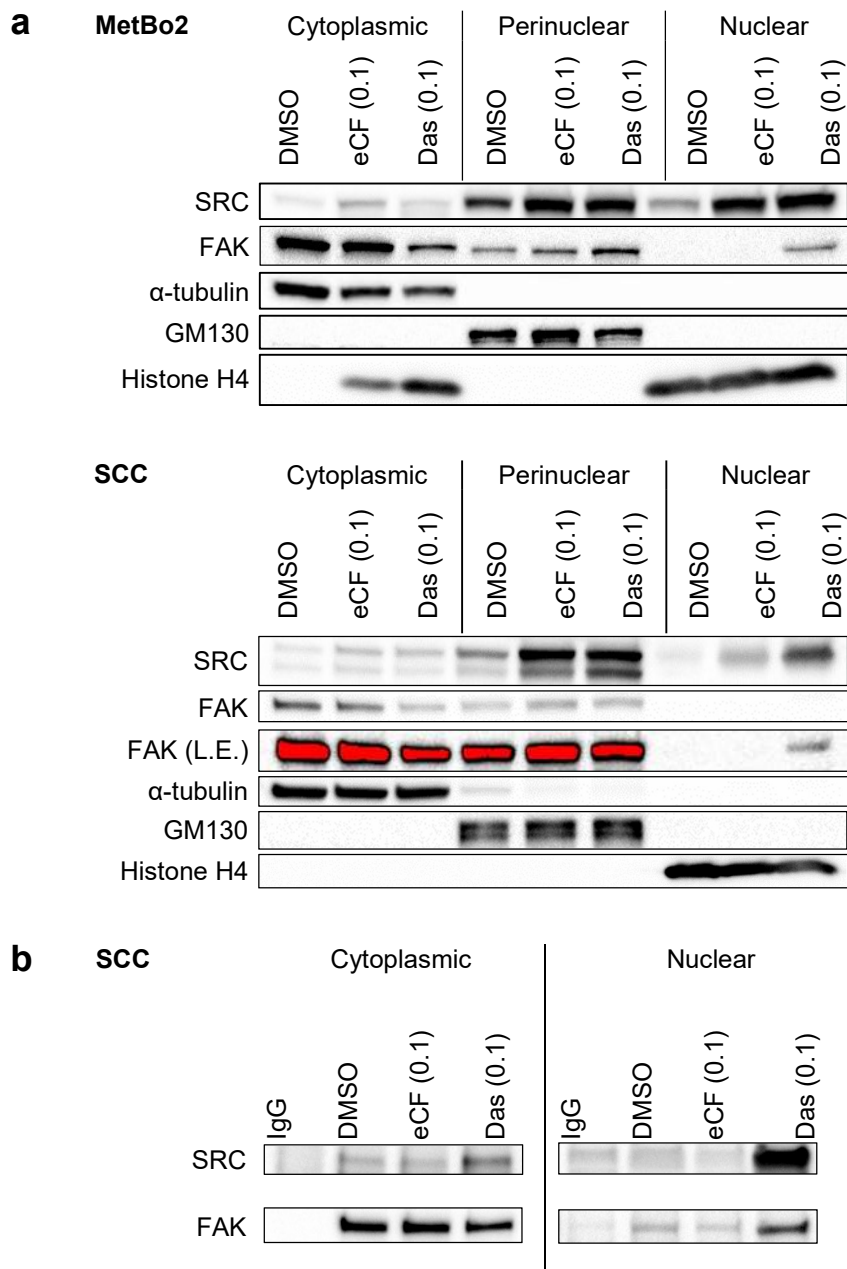

**Figure S9. (a)** Subcellular fractionation of MetBo2 and SCC cells after treatment with eCF506 or dasatinib (both 0.1  $\mu$ M) for 6 h prior to subcellular fractionation and analysis by Western blot. Representative Western blot of three biological repeats. (L.E.) = longer exposure. **(b)** Co-immunoprecipitation of FAK in cytoplasmic and nuclear fraction. SCC cells were treated with eCF506 or dasatinib (both 0.1  $\mu$ M) for 6 h prior to subcellular fractionation followed by co-immunoprecipitation using FAK antibody overnight. Representative Western blot of three biological repeats. All concentrations given in  $\mu$ M.

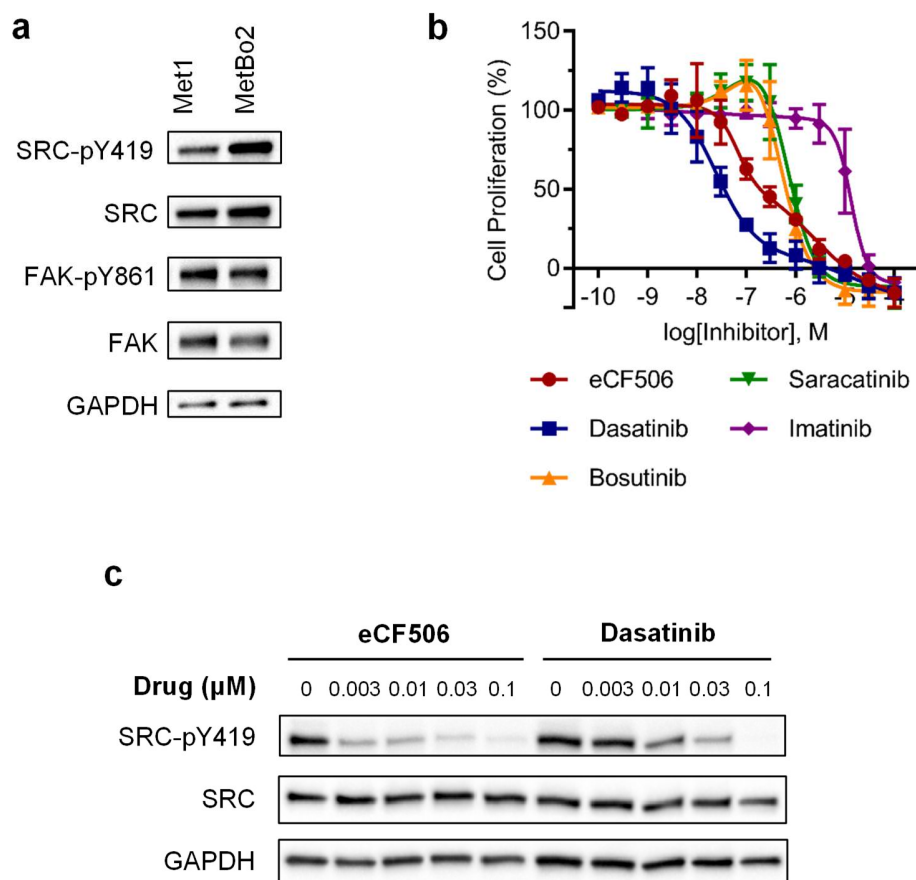

**Figure S10.** (a) Analysis of total and phosphorylated Src and FAK signature in murine Met1 and MetBo2 cells. Representative Western blot of three biological repeats. (b) Cell proliferation of MetBo2 cells treated for 5 d with inhibitors (eCF506, dasatinib, bosutinib, saracatinib and imatinib). Graph shows average of three biological repeats with standard deviation. (c) Analysis of total and phosphorylated Src after treating MetBo2 cells with eCF506 and dasatinib. Cells were treated with the inhibitors for 24 h prior to cell lysis and analysis by Western blot.

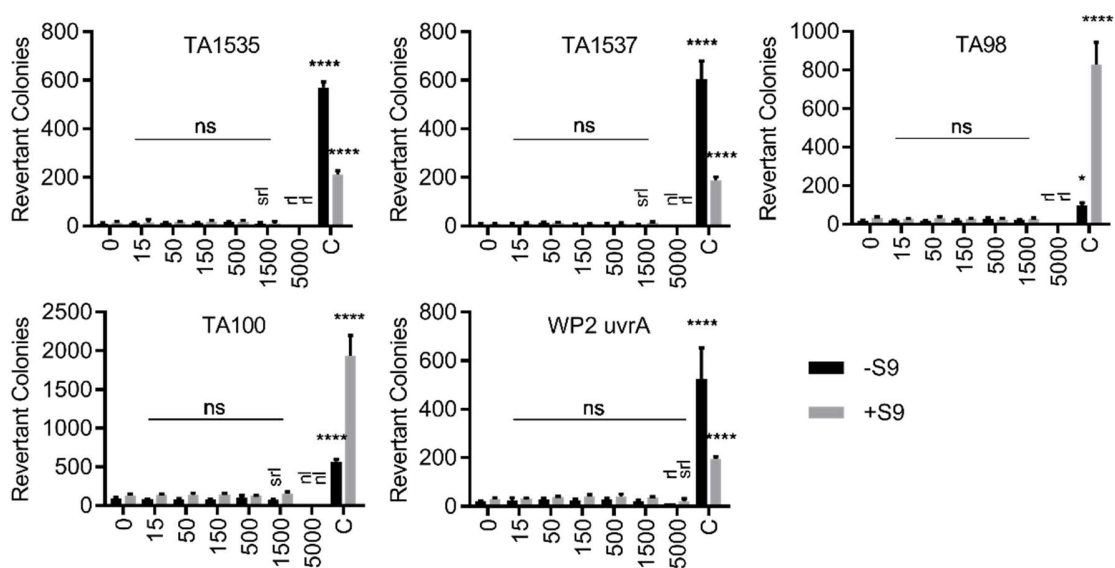

**Figure S11.** Ames test of eCF506. The mutagenicity of eCF506 was tested in five different auxotrophic bacterial strains. Graphs show average of three biological repeats with standard deviation. Bacteriotoxic effects: srl = slightly reduced lawn, rl = reduced lawn, nl = no lawn. Statistical analysis was done by two-way ANOVA with Dunnett's correction for multiple comparison showed no significant ( $P > 0.05$ ) changes for eCF506, while the controls all significantly increased the number of revertant colonies compared to the respective untreated control; ns,  $P > 0.05$ ; \*,  $P < 0.05$ ; \*\*\*\*,  $P < 0.0001$ . The test produced no greater increases in revertants than those expected from normal variation in the negative control number of revertants, for each strain. Consequently, the test was considered negative, confirming eCF506 is not mutagenic according to this assay.

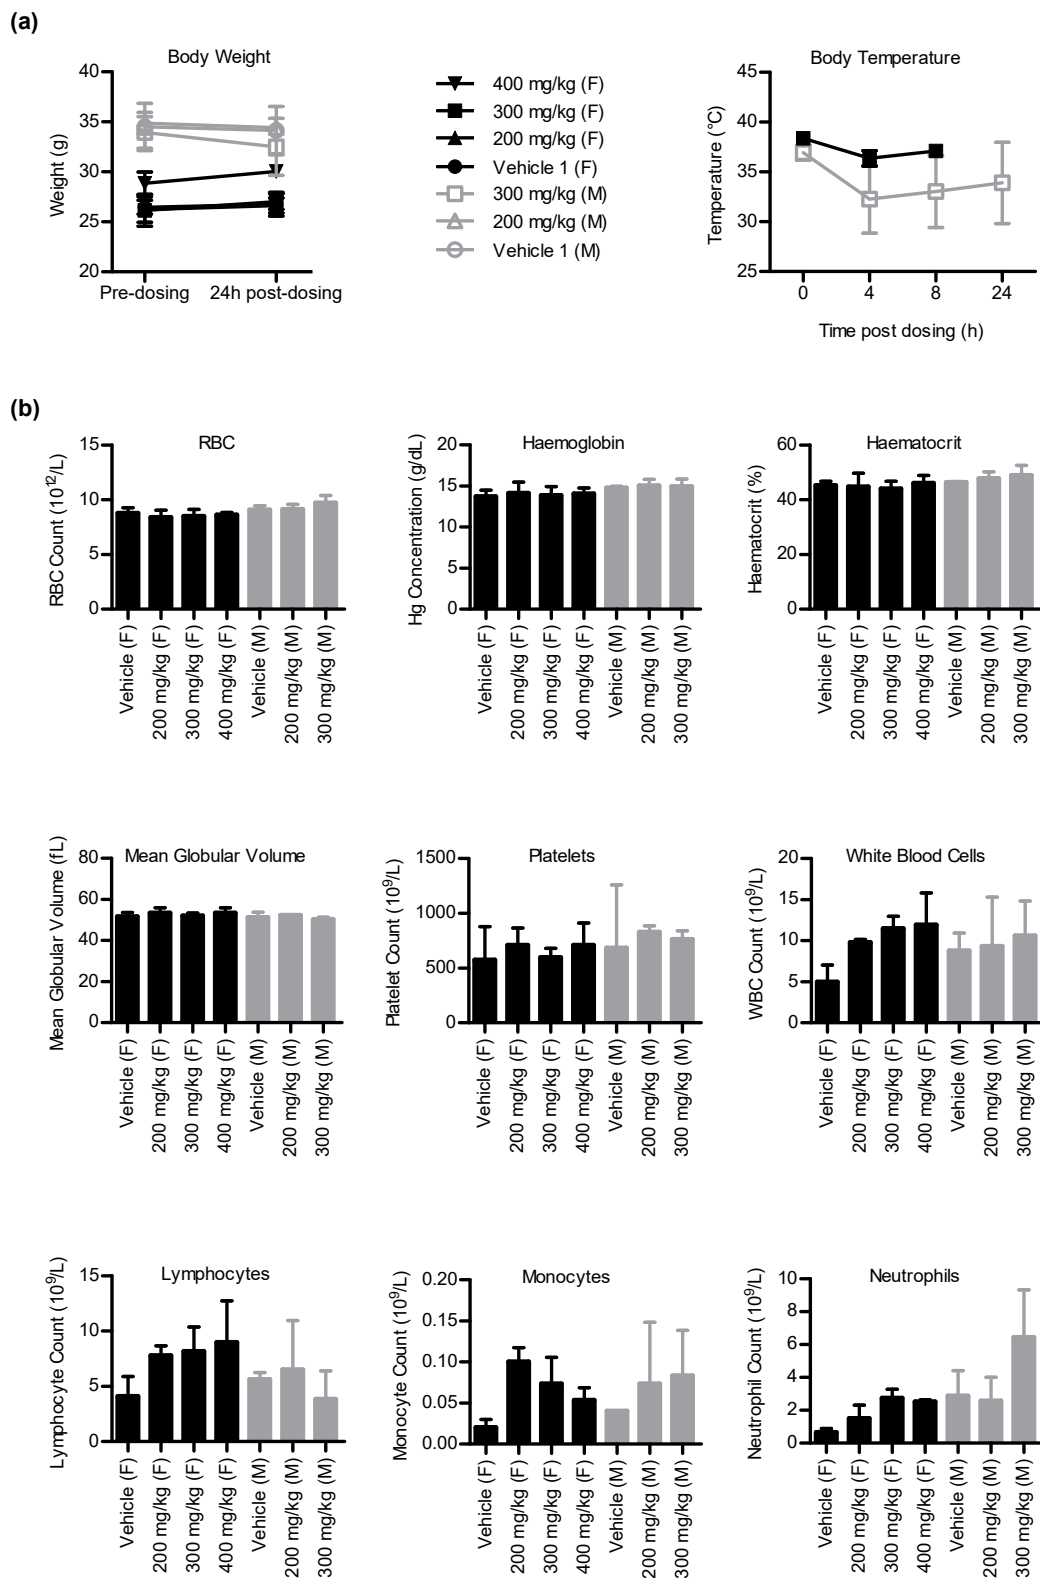

**Figure S12.** Acute toxicity study. **(a)** Body weight and temperature and **(b)** Haematology results of individual Swiss mice treated with eCF506 in an acute toxicity study. 3 mice/group. Results showed increased white blood cell count and no change in red blood cell count.

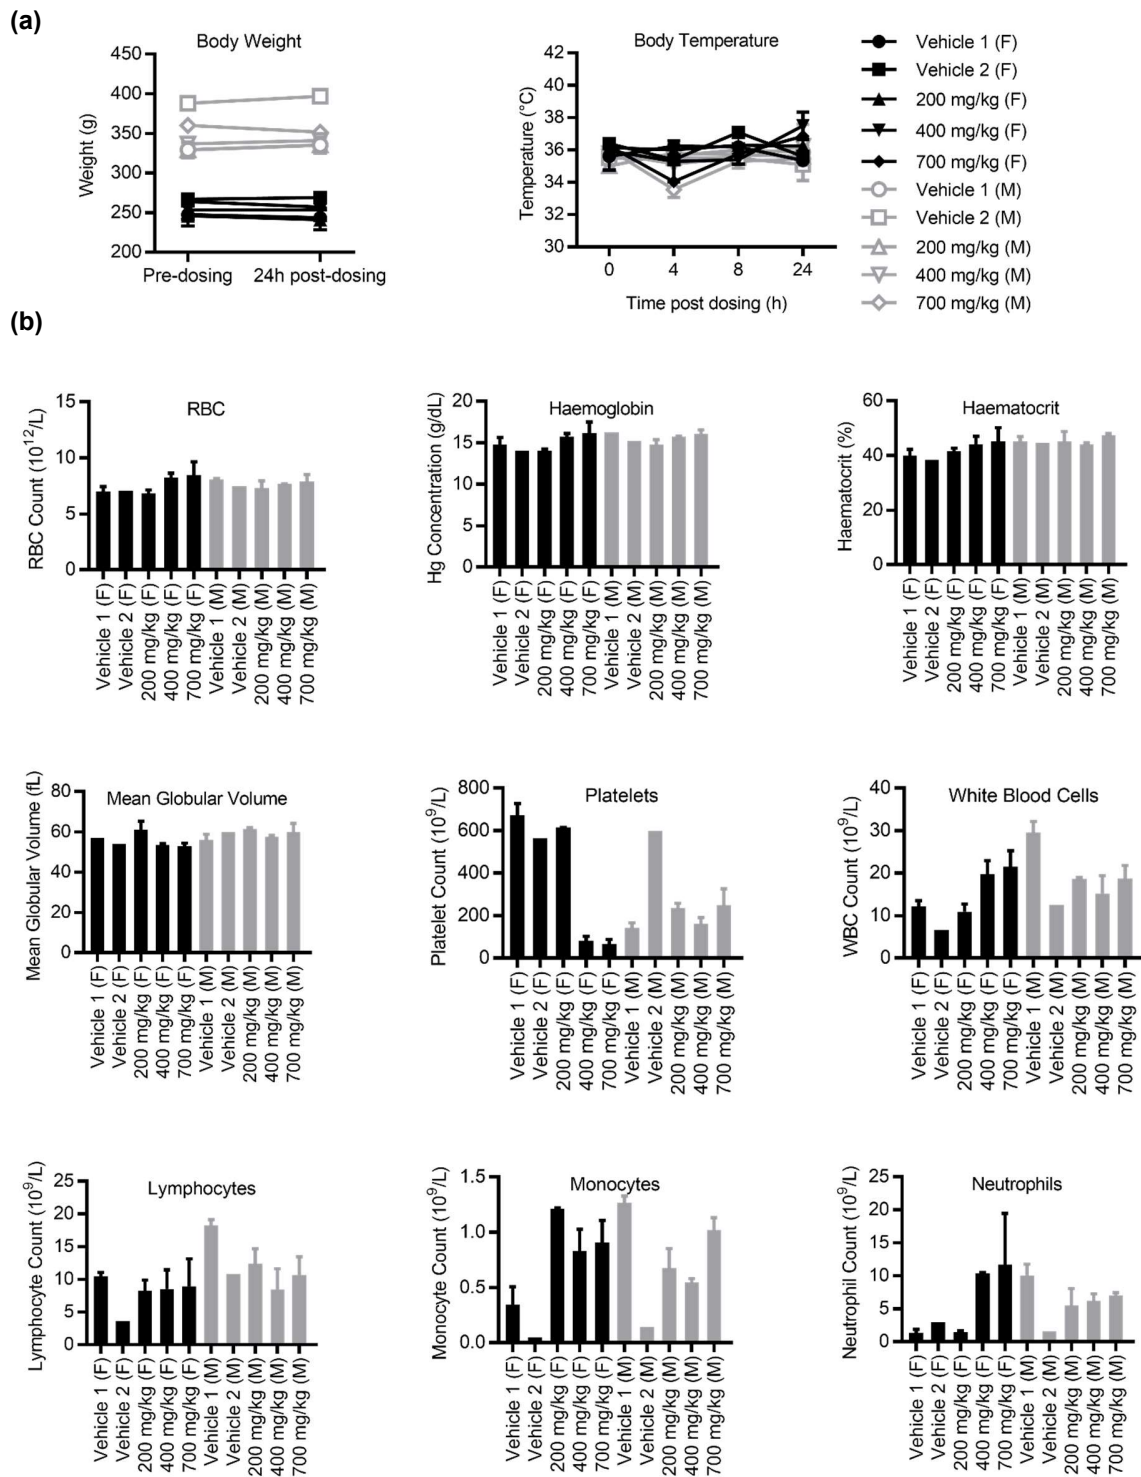

**a**

| Time h | Animal ID | Blood nM |
|--------|-----------|----------|
| 2      | 10        | 3618     |
|        | 11        | 4238     |
|        | 12        | 4405     |
|        | MEAN      | 4087     |
|        | SD        | 415      |
| 8      | 13        | 969      |
|        | 14        | 753      |
|        | 15        | 756      |
|        | MEAN      | 826      |
|        | SD        | 124      |
| 24     | 16        | 92.5     |
|        | 17        | 279      |
|        | 18        | 244      |
|        | MEAN      | 205      |
|        | SD        | 99.0     |

| PK parameters following single oral administration at 40 mg/kg of eCF506 in female CD1 mice |                     |          |                        |                       |           |            |
|---------------------------------------------------------------------------------------------|---------------------|----------|------------------------|-----------------------|-----------|------------|
| Matrix                                                                                      | Cmax (ng/mL - ng/g) | tmax (h) | AUC (0-last) (ng.h/mL) | AUC (0-inf) (ng.h/mL) | tlast (h) | t1/2z (h)  |
| Blood (rating)                                                                              | 2087                | 2        | 11979                  | 12810                 | 24        | 5.5 (long) |

**b**

| Time h | Animal ID | Blood nM |
|--------|-----------|----------|
| 2      | 13        | 4732     |
|        | 14        | 7272     |
|        | 15        | 8675     |
|        | MEAN      | 6893     |
|        | SD        | 1999     |
| 8      | 16        | 1497     |
|        | 17        | 1665     |
|        | 18        | 1167     |
|        | MEAN      | 1443     |
|        | SD        | 253      |
| 24     | 19        | 351      |
|        | 20        | 516      |
|        | 21        | 415      |
|        | MEAN      | 427      |
|        | SD        | 83.4     |

| PK parameters following single oral administration at 80 mg/kg of eCF506 in female CD1 mice |                     |          |                        |                       |                             |                           |           |            |
|---------------------------------------------------------------------------------------------|---------------------|----------|------------------------|-----------------------|-----------------------------|---------------------------|-----------|------------|
| Matrix                                                                                      | Cmax (ng/mL - ng/g) | tmax (h) | AUC (0-last) (ng.h/mL) | AUC (0-inf) (ng.h/mL) | Ratio AUClast80 / AUClast40 | Ratio AUCinf80 / AUCinf40 | tlast (h) | t1/2z (h)  |
| Blood (rating)                                                                              | 3520                | 2        | 21016                  | 22897                 | 1.8                         | 1.8                       | 24        | 6.0 (long) |

**Figure S14.** Blood levels of eCF506 in female mice (n = 3 / group) at 2, 8 and 24 h following single oral administration of eCF506 at **(a)** 40 mg/Kg or **(b)** 80 mg/Kg. Calculated PK parameters are shown on the right.

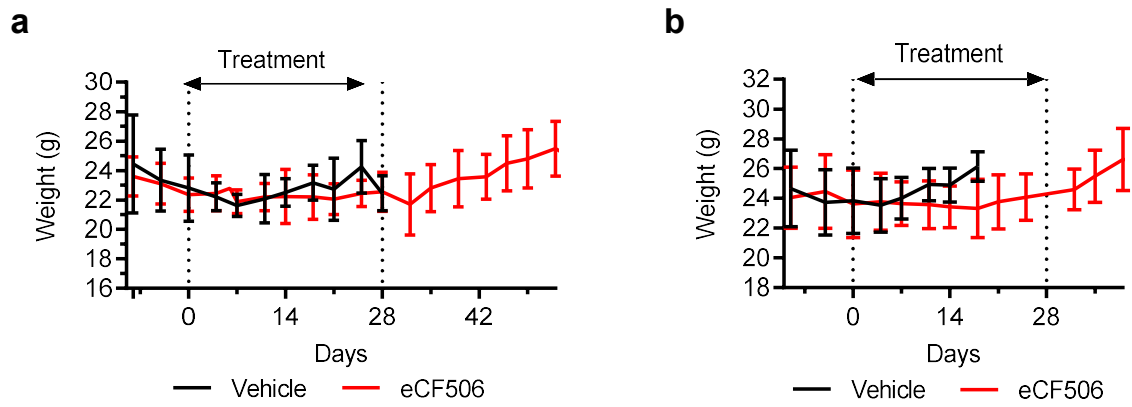

**Figure S15.** Analysis of animals weight over the course of the study. **(a)** FVB mice. **(b)** CD1 nude mice.

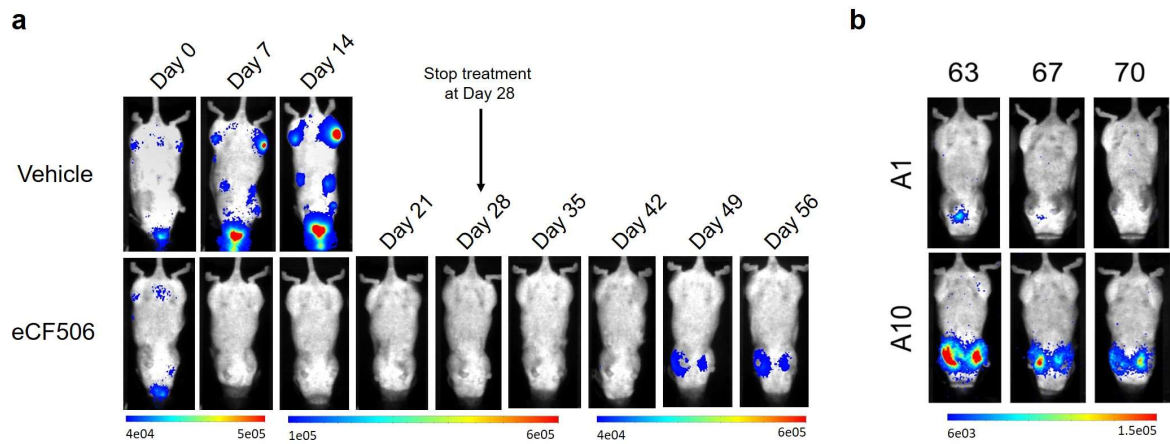

**Figure S16. (a)** Weekly bioluminescence tomography imaging of one mouse treated with vehicle vs. one mouse (A10) treated with eCF506. Note the formation of lung metastases in the eCF506-treated mouse at day 49. **(b)** Bioluminescence tomography images of two mice (A1 and A10) with relapsed tumors in the thoracic box at day 63. Treatment with eCF506 (40 mg/Kg, QD) was re-started on day 63 for 7 days, showing reduction of metastatic burden in both mice.



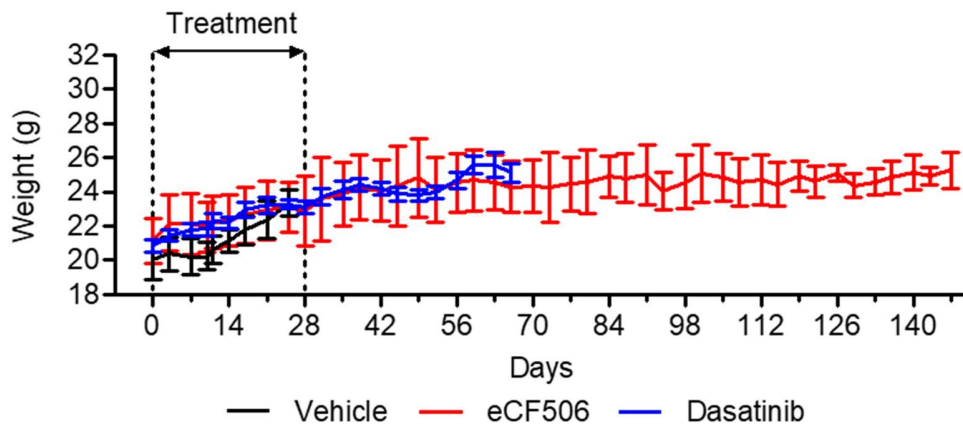

**Figure S17.** Analysis of animals weight over the course of the head-to-head efficacy study in wildtype FVB mice.

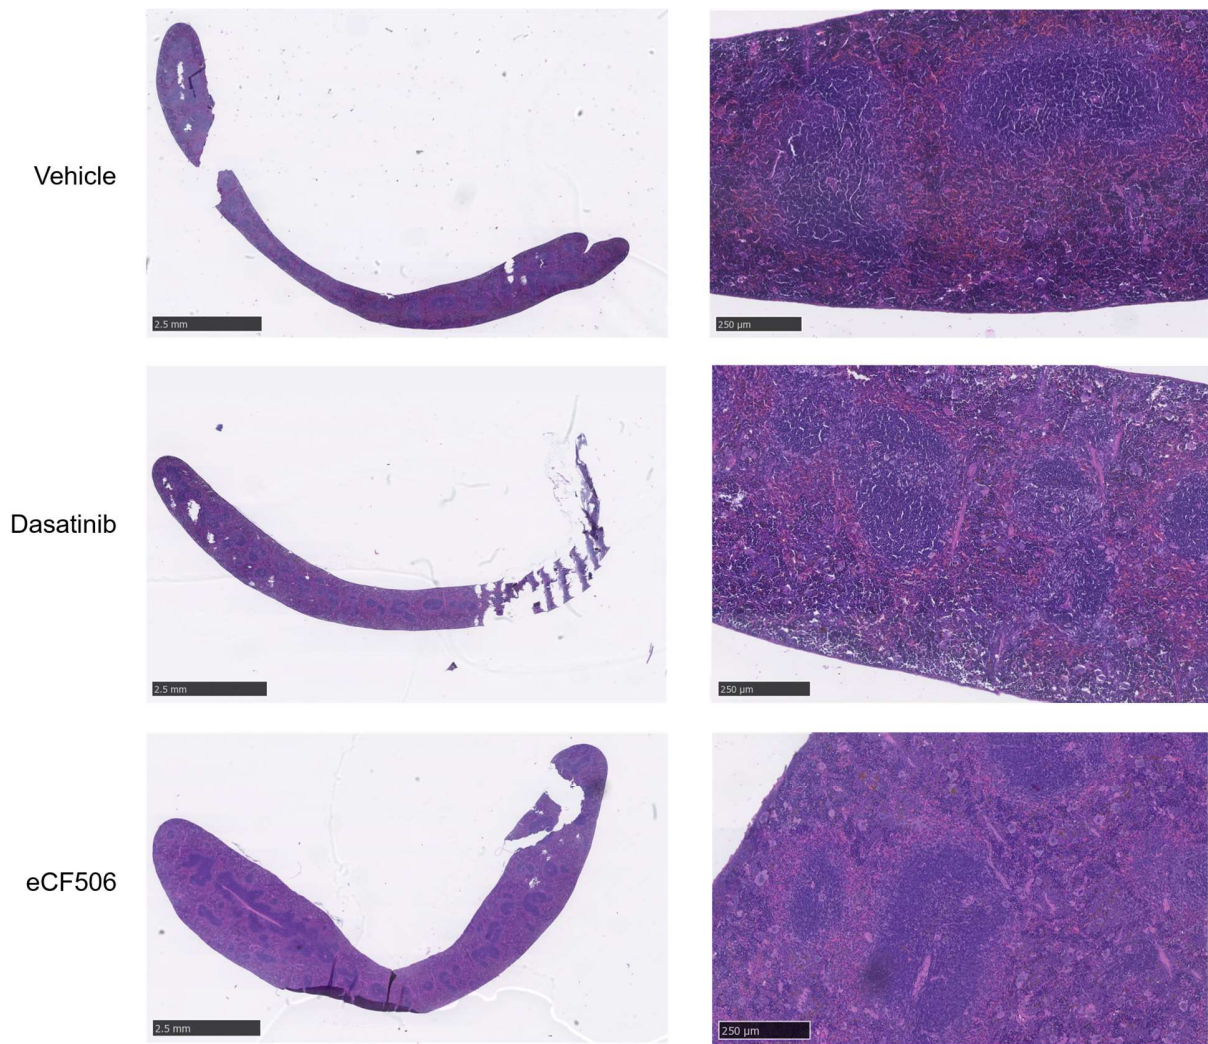

**Figure S18.** Representative H&E-stained histology images of spleens from tumour-bearing mice treated with vehicle (top), dasatinib (centre) and eCF506 (bottom). Whole spleens are shown at the left (size bar 2.5 mm) for comparison of spleen size and magnified tissue sections on the right (magnification x10, size bar 250 µm), showing normal splenic histology.

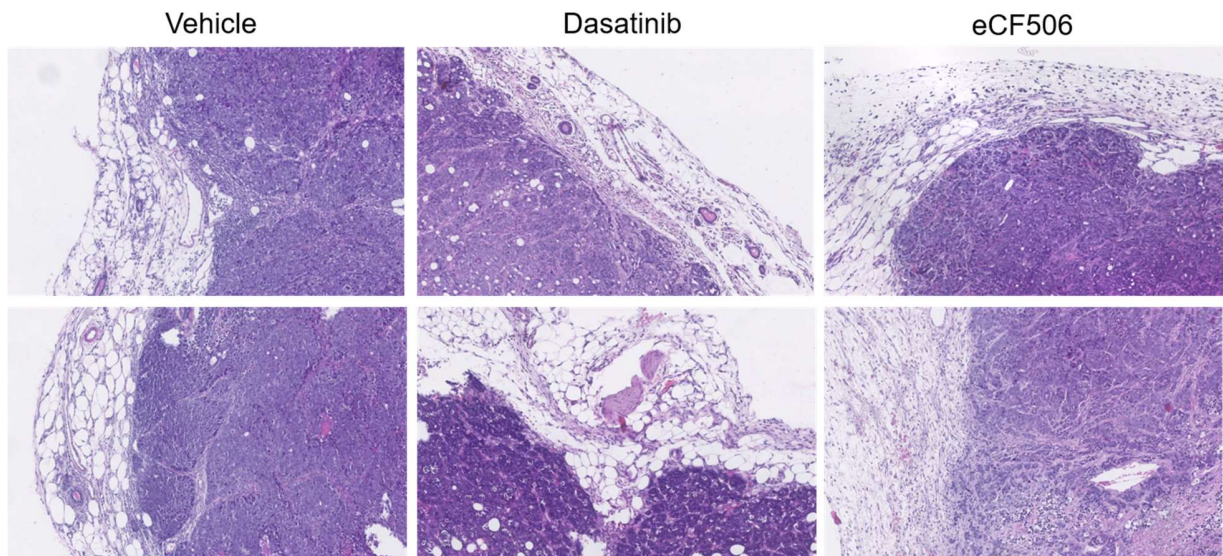

**Figure S19.** Representative H&E-stained histology images (magnification x10) of MetBo2 orthotopic breast tumors treated with vehicle (left), dasatinib (centre) and eCF506 (right). Images illustrate the peritumoral area with surrounding adipose-rich connective tissue showing differences between the groups in peritumoral chronic inflammation and lymphocyte infiltration (moderate to marked for the eCF506-treated tumors, but only mild for the vehicle control and dasatinib-treated tumors).



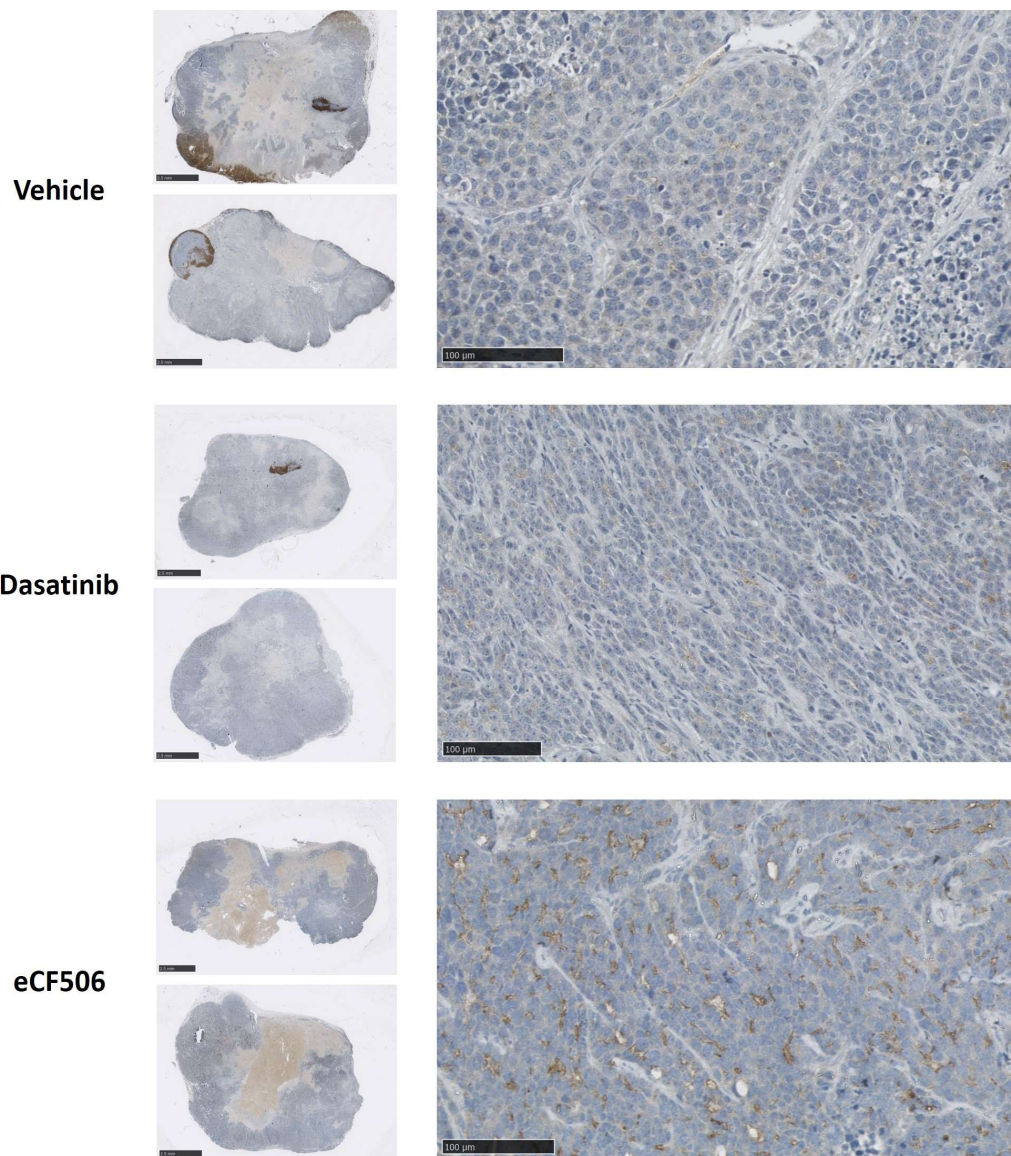

**Figure S20.** Representative IHC images of sections of MetBo2 orthotopic breast tumors treated with vehicle (left), dasatinib (centre) and eCF506 (right). Images illustrate two complete tumor sections and an amplification (20 x magnification) of the intratumoral area to identify CD3+ cells (brown). NOTE: tumors of mice treated with eCF506 did not show lymph node components (dark brown), while they were clearly observed in the tumor sections from mice treated with vehicle.

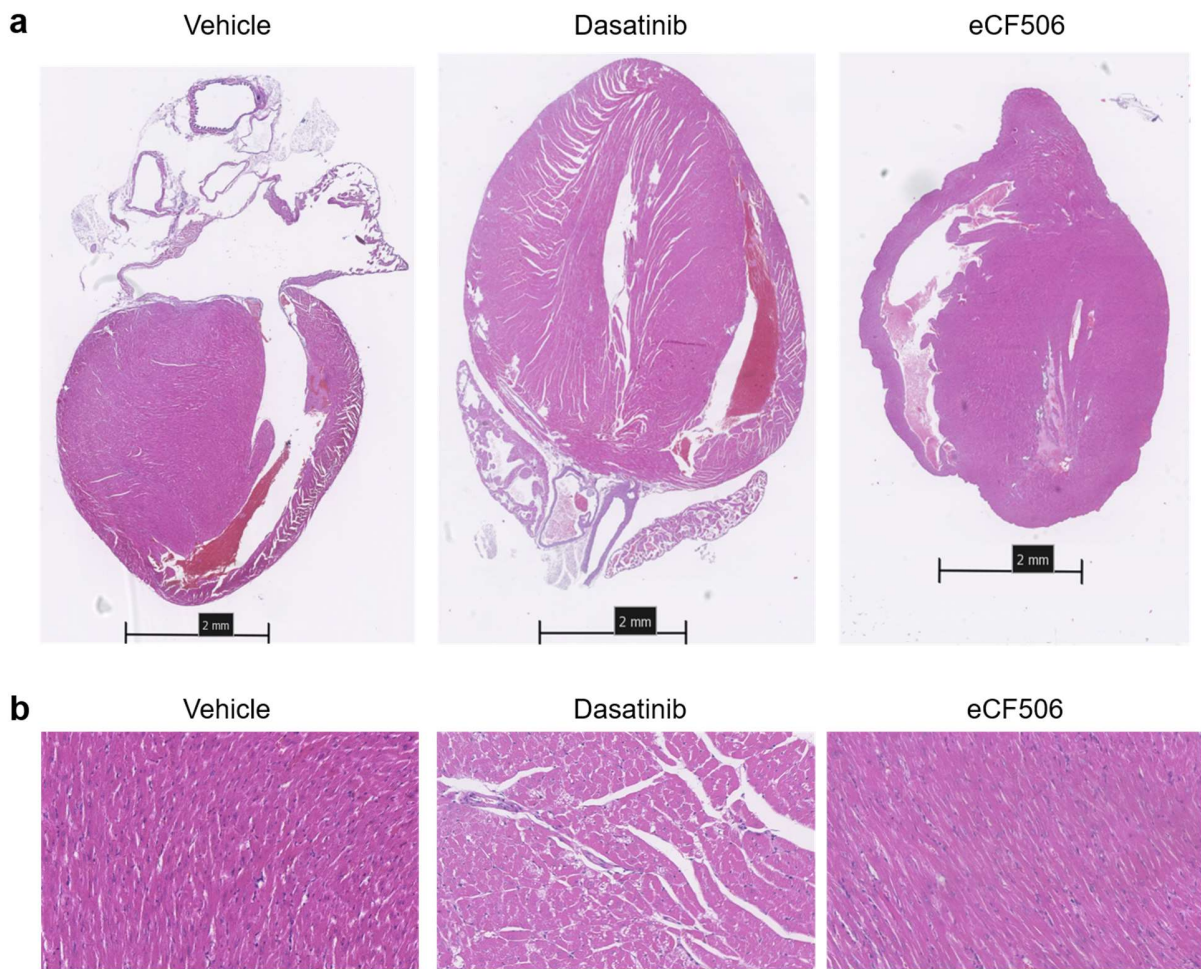

**Figure S21.** Representative H&E-stained histology images of hearts from tumor-bearing mice treated with vehicle (left), dasatinib (centre) and eCF506 (right). **(a)** Whole heart images (size bar 2mm). **(b)** Images (x20 magnification) of normal myocardium in the vehicle control and eCF506-treated murine hearts, but in dasatinib-treated heart there is focal myocyte hydropic change and variation in myocyte cell size, consistent with myocardial hypertrophy and focal cell injury.

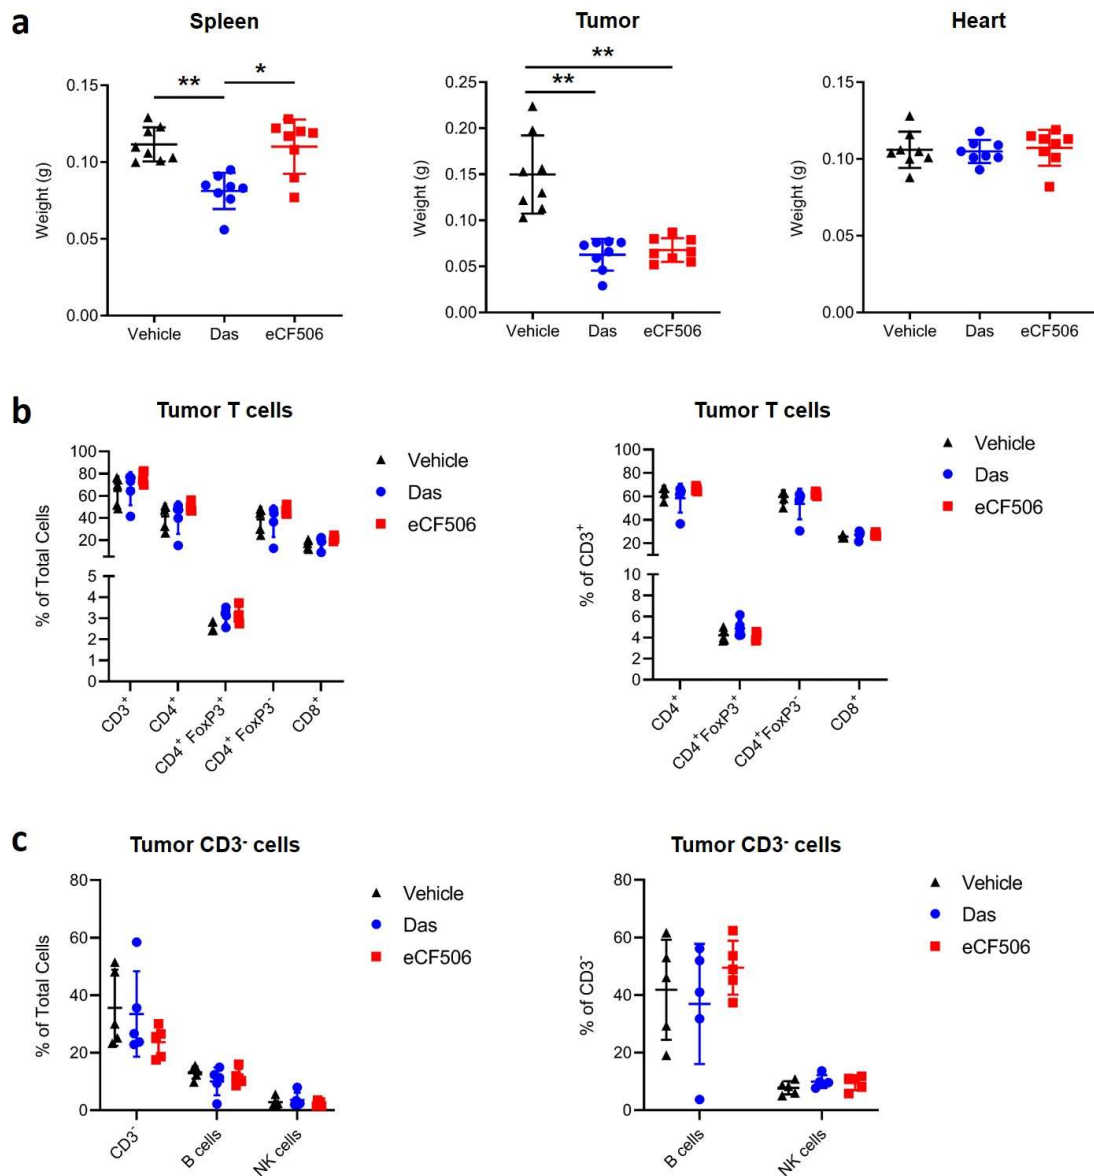

**Figure S22.** Weight analysis of organs and immune cell quantification of MetBo2 tumor samples from the 5-day treatment study. MetBo2 tumor bearing mice were treated with vehicle, dasatinib (Das) or eCF506 for 5 d, spleen, heart and tumor tissues harvested at endpoint. A) Spleen, tumour and heart weights, n=8 per group. Significance was assessed by t-test with \* = <0.05, \*\* = <0.01. B,C) Immunophenotyping of tumor samples by flow cytometry, n=5 per group. B) Tumor infiltrating T cell subsets are shown as either a percentage of total cells (left) or CD3<sup>+</sup> (right). C) Tumor infiltrating CD3<sup>-</sup> cell subsets are shown as either a percentage of total cells (left) or CD3<sup>-</sup> (right).

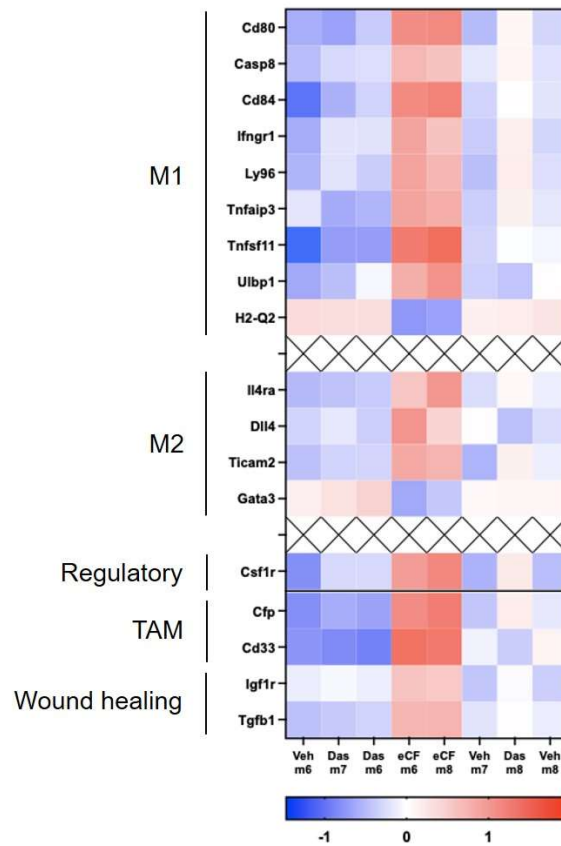

**Figure S23.** Transcriptomics analysis of tumor samples from the 5-day treatment study. RNA was extracted from tumor samples (n= 2 for eCF506-treated group, and n= 3 for vehicle- and dasatinib-treated animals) and analyzed using the PanCancer Immune Profiling panel in the NanoString nCounter® platform. Heatmap depicts individual pathway Z scores of greatest changes found from the gene expression screening of tumors treated with vehicle (Veh), dasatinib (Das) or eCF506 (eCF). mN identifies the origin of the sample.

## References

1. Seeliger MA et al. High yield bacterial expression of active c-Abl and c-Src tyrosine kinases. *Protein Sci* **2005**;14:3135-39.
2. Levinson NM, Boxer SG. A conserved water-mediated hydrogen bond network defines bosutinib's kinase selectivity. *Nat Chem Biol* **2014**;10:127-32.
3. Kabsch WX. *Acta Crystallogr D Biol Crystallogr* **2010**;66:125-32.
4. Evans PR, Murshudov GN. How good are my data and what is the resolution? *Acta Crystallogr D Biol Crystallogr* **2013**;69:1204-14.
5. McCoy AJ et al. Phaser crystallographic software. *J Appl Crystallogr* **2007**;40:658-74.
6. Murshudov GN, Vagin AA, Dodson EJ. Refinement of macromolecular structures by the maximum-likelihood method. *Acta Crystallogr D Biol Crystallogr* **1997**;53:240-55.
7. Emsley P, Cowtan K. Coot: model-building tools for molecular graphics. *Acta Crystallogr D Biol Crystallogr* **2004**;60:2126-32.
8. Schuck P. Size-distribution analysis of macromolecules by sedimentation velocity ultracentrifugation and lamm equation modeling. *Biophys J* **2000**;78:1606-19.
9. Holde KE. *Physical biochemistry*. Pearson Prentice Hall, 1985.
10. Laue TM, Shah BD, Ridgeway TM, Pelletier SL. *Computer-Aided Interpretation of analytical sedimentation data for proteins*. Cambridge: Royal Society of Chemistry; 1992.
11. Jafari R et al. The cellular thermal shift assay for evaluating drug target interactions in cells. *Nat Protoc* **2014**;9:2100–22.
12. Anastassiadis et al. Comprehensive assay of kinase catalytic activity reveals features of kinase inhibitor selectivity. *Nat Biotechnol* **2011**;29:1039-45.



13. Macleod KG, et al. Reverse Phase Protein Arrays and Drug Discovery. *Methods Mol Biol* **2017**;1647:153–69.
14. Bankhead P, et al. QuPath: Open source software for digital pathology image analysis. *Sci Rep* **2017**;7:16878.
15. Nguyen et al. Identification of new binding proteins of focal adhesion kinase using immunoprecipitation and mass spectrometry. *Sci Rep* **2019**;9:12908.
16. Song et al. Dual inhibition of MET and SRC kinase activity as a combined targeting strategy for colon cancer. *Exp Ther Med* **2017**;14:1357.
17. Min et al. Targeting the insulin-like growth factor receptor and Src signaling network for the treatment of non-small cell lung cancer. *Mol Cancer* **2015**;14:113.
18. Hartman et al. The Tyrosine Phosphatase SHP2 Regulates Focal Adhesion Kinase to Promote EGF-Induced Lamellipodia Persistence and Cell Migration. *Mol Cancer Res* **2013**;11:651.
19. Zhang et al. Focal adhesion kinase promotes phospholipase C-gamma1 activity. *Proc Natl Acad Sci USA* **1999**;96:9021.
20. Giambelluca et al. Expression and regulation of glycogen synthase kinase 3 in human neutrophils. *Int J Biochem Cell Biol* **2013**;45:2660.
21. Marhäll et al. The Src family kinase LCK cooperates with oncogenic FLT3/ITD in cellular transformation. *Sci Rep* **2017**;7:13734.
